# Supplementary material for: Overexpression of <em>AmRosea1 </em>Gene Confers Drought and Salt Tolerance in Rice
Source: Preprints.org preprint supplement (doi:10.20944/preprints201612.0074.v1), 2016-12-14
Supplement: Supplementary file 1 [file supplementary]

Table S9. Expressions of anthocyanin relating genes in OXR and WT plants under drought stress

| Gene ID         | OXR (RPKM) |         |         | WT (RPKM) |         |         |
|-----------------|------------|---------|---------|-----------|---------|---------|
|                 | 0h         | 6h      | 24h     | 0h        | 6h      | 24h     |
| <b>F3H</b>      |            |         |         |           |         |         |
| OS02T0767300-01 | 1.406      | 0.667   | 1.527   | 2.659     | 0.602   | 0.771   |
| Os03t0122300-01 | 142.858    | 188.527 | 245.626 | 210.445   | 156.028 | 297.271 |
| Os04t0581000-01 | 4.058      | 3.429   | 8.436   | 1.735     | 0.648   | 3.459   |
| <b>F3'H</b>     |            |         |         |           |         |         |
| Os10t0317900-01 | 37.962     | 14.645  | 17.149  | 48.349    | 19.766  | 26.152  |
| Os10t0320100-01 | 8.212      | 0.755   | 1.481   | 25.071    | 0.553   | 1.937   |
| <b>FLS</b>      |            |         |         |           |         |         |
| OS02T0767300-01 | 1.406      | 0.667   | 1.527   | 2.659     | 0.602   | 0.771   |
| <b>DFR</b>      |            |         |         |           |         |         |
| OS01T0633500-00 | 0          | 0       | 0       | 0         | 0       | 0       |
| Os03t0184550-01 | 15.324     | 19.105  | 21.783  | 3.696     | 8.042   | 19.385  |
| OS03T0184600-01 | 13.05      | 10.801  | 14.496  | 10.672    | 11.117  | 13.673  |
| OS08T0183900-01 | 13.821     | 11.787  | 3.293   | 23.287    | 27.634  | 9.186   |
| Os08t0515900-01 | 0.701      | 1.16    | 0.701   | 0.636     | 0.461   | 0.614   |
| Os09t0491868-00 | 0          | 0       | 0       | 0         | 0       | 0       |
| <b>UFGT</b>     |            |         |         |           |         |         |
| Os06t0192100-00 | 0.377      | 0.312   | 0.063   | 0.559     | 0.619   | 0.264   |
| Os07t0148200-01 | 6.002      | 5.865   | 3.533   | 8.74      | 6.007   | 4.794   |
