# Supplementary material for: Overexpression of <em>AmRosea1 </em>Gene Confers Drought and Salt Tolerance in Rice
Source: Preprints.org preprint supplement (doi:10.20944/preprints201612.0074.v1), 2016-12-14
Supplement: Supplementary file 2 [file supplementary]

Table S8 List of DEGs related stress tolerance in OXR plants compared with WT under salt condition.

| Gene ID                                 | log <sub>2</sub> (RPKM <sub>MoxR</sub> /RPKM <sub>WT</sub> ) |       |       | Description                                                    |
|-----------------------------------------|--------------------------------------------------------------|-------|-------|----------------------------------------------------------------|
|                                         | 0h                                                           | 1h    | 6h    |                                                                |
| HSP (heat shock protein)                |                                                              |       |       |                                                                |
| Os01t0135900-02                         | -0.36                                                        | 0.32  | 1.14  | LMW heat shock protein.                                        |
| Os03t0266300-01                         | -0.48                                                        | 1.08  | -0.43 | Class I low-molecular-weight heat shock protein 17.9.          |
| Os03t0266900-02                         | -0.63                                                        | 1.24  | -0.13 | Low molecular mass heat shock protein Oshsp17.3.               |
| Os05t0579900-02                         | 0.03                                                         | -1.36 | 0.42  | Heat shock protein DnaJ.                                       |
| Os06t0253100-01                         | -0.86                                                        | 2.57  | -0.65 | Heat shock protein Hsp20 domain containing protein.            |
| Os06t0716700-01                         | -0.57                                                        | 3.6   | 2.08  | Similar to Heat shock protein 90.                              |
| Os08t0500700-01                         | -0.71                                                        | 1.03  | -0.12 | Similar to Heat shock protein 82.                              |
| LEA (late embryogenesis abundant)       |                                                              |       |       |                                                                |
| Os01t0314800-01                         | -0.99                                                        | -1.44 | -0.42 | Late embryogenesis abundant protein 3 family protein.          |
| Os01t0705200-01                         | NA                                                           | -2.09 | -0.37 | Late embryogenesis abundant protein repeat containing protein. |
| Os03t0322900-00                         | -1.6                                                         | -2.14 | -0.32 | Late embryogenesis abundant protein repeat containing protein. |
| Os08t0327700-01                         | NA                                                           | -2.09 | -0.8  | Late embryogenesis abundant (LEA) group 1 family protein.      |
| Os05t0542500-02                         | 2.02                                                         | -0.65 | -0.23 | LEA-like protein.                                              |
| Chaperone protein                       |                                                              |       |       |                                                                |
| Os08t0405700-01                         | 0.66                                                         | -1.12 | -0.43 | Similar to Copper chaperone homolog CCH.                       |
| Metallothionein                         |                                                              |       |       |                                                                |
| Os12t0570700-01                         | 0.49                                                         | 1.46  | 0.29  | Similar to Metallothionein-like protein type 1.                |
| PIP (plasma membrane intrinsic protein) |                                                              |       |       |                                                                |
| Os02t0629200-02                         | -0.46                                                        | -1.12 | -0.49 | Similar to HvPIP2;1 protein.                                   |
