# Supplementary material for: Overexpression of <em>AmRosea1 </em>Gene Confers Drought and Salt Tolerance in Rice
Source: Preprints.org preprint supplement (doi:10.20944/preprints201612.0074.v1), 2016-12-14
Supplement: Supplementary file 2 [file supplementary]

## Sheet: PEG_0h_up
List of up-regulated genes in transgenic rice plants OXR21 compared to wild type plants before PEG treatment
Gene_ID	OXR			WT			OXR 0h vs WT 0h
	0h	6h	24h	0h	6h	24h	normalized log2FC	z_score	P_value	FDR
Os03t0353400-02	84.873	35.973	17.353	20.665	47.015	38.407	2.08999	6.62987	3.35984e-11	1.70441e-08
Os03t0826800-01	33.32	384.155	82.843	9.869	96.927	76.601	1.80729	3.77245	0.000161652	0.0185966
Os03t0766800-01	100.838	28.009	18.306	32.001	164.754	55.117	1.70773	6.30927	2.80355e-10	1.19236e-07
Os05t0491200-02	81.115	28.824	111.514	33.525	23.236	130.535	1.32661	4.69594	2.65387e-06	0.000542433
Os03t0292100-01	78.436	29.168	33.692	34.859	66.511	56.909	1.22186	4.33104	1.4841e-05	0.00233164
Os03t0405500-01	176.256	77.531	136.679	73.573	39.134	80.9	1.3123	6.86485	6.6563e-12	3.59312e-09
Os08t0203400-01	69.967	14.246	147.101	15.025	5.488	109.873	2.27119	6.33922	2.30937e-10	1.01287e-07
Os01t0537250-01	44.236	83.712	31.489	6.567	13.338	11.989	2.80379	5.67391	1.39575e-08	4.55567e-06
Os06t0133400-01	173.466	59.863	52.648	70.324	91.407	75.575	1.35444	6.97783	2.99781e-12	1.72908e-09
Os01t0916100-01	56.103	20.65	48.544	18.712	11.905	55.88	1.63599	4.56471	5.00182e-06	0.000957281
Os04t0688300-01	69.8	146.548	79.954	35.559	15.853	24.28	1.02489	3.54601	0.000391117	0.0383869
Os09t0412300-01	94.151	13.363	35.899	30.503	23.022	39.744	1.6779	6.02103	1.73306e-09	6.57393e-07
Os05t0429100-02	27.307	7.472	37.606	6.426	7.972	8.701	2.13915	3.81633	0.000135453	0.0160203
Os02t0682300-01	48.481	29.871	76.783	16.547	22.156	78.986	1.60273	4.18106	2.9015e-05	0.00421267
Os02t0584800-01	101.724	26.484	60.189	49.055	77.655	126.014	1.10406	4.54872	5.39731e-06	0.0010283
Os06t0683400-02	151.786	44.969	39.757	50.791	147.31	88.54	1.63127	7.49297	6.73308e-14	4.2954e-11
Os03t0305100-01	69.4	78.836	177.928	33.871	38.642	182.145	1.08676	3.7093	0.000207831	0.0228312
Os01t0186950-00	26.751	4.207	4.79	3.023	14.449	16.291	3.19742	4.69994	2.6024e-06	0.000534507
Os01t0192000-02	61.696	18.635	44.771	24.343	6.109	40.16	1.39355	4.25243	2.11463e-05	0.00321432
Os04t0370900-01	98.651	44.932	84.6	41.862	22.523	61.977	1.28857	5.06354	4.11545e-07	0.000105019
Os07t0147500-01	532.971	1118.49	849.731	210.772	1870.92	1991.93	1.39025	12.4789	9.73825e-36	5.85756e-32
Os11t0677101-00	33.887	28.551	69.687	7.446	1.886	23.102	2.23807	4.37234	1.22924e-05	0.00199835
Os05t0183100-01	97.551	48.227	83.985	41.978	68.618	86.988	1.2684	4.97377	6.5664e-07	0.000157987
Os01t0615050-00	48.78	56.623	147.257	20.951	29.602	50.795	1.27115	3.523	0.000426683	0.0415868
Os01t0186900-01	93.44	19.239	22.834	18.665	67.697	88.215	2.37558	7.52522	5.26331e-14	3.40941e-11
Os10t0419400-01	26.729	88.903	135.516	3.611	1.8	16.32	2.93981	4.5167	6.28121e-06	0.00117022
Os02t0228300-01	113.803	90.033	177.703	38.876	31.991	131.535	1.60146	6.4024	1.52956e-10	7.00022e-08
Os01t0934100-01	88.124	38.036	37.198	42.572	59.491	66.726	1.10151	4.22578	2.38115e-05	0.0035427
Os04t0610400-00	128.467	30.272	56.653	36.261	43.415	86.533	1.87678	7.60045	2.95099e-14	1.97224e-11
Os04t0486950-01	30.456	288.796	186.725	8.223	45.975	148.21	1.94087	3.78462	0.000153945	0.0178073
Os06t0110000-01	33.184	10.312	43.651	5.711	1.987	9.863	2.59055	4.71142	2.45994e-06	0.000507725
Os03t0152000-01	45.362	8.942	12.462	13.809	14.762	27.908	1.76775	4.33499	1.45764e-05	0.00230729
Os01t0303800-02	55.716	190.781	164.045	16.543	30.523	103.983	1.80375	4.87169	1.10649e-06	0.000250476
Os02t0681200-01	63.273	16.078	26.153	13.299	15.322	33.375	2.30215	6.07782	1.2183e-09	4.74969e-07
Os11t0227200-01	43.217	22.573	72.695	16.626	5.935	33.22	1.43003	3.6292	0.000284298	0.0292579
Os05t0119300-03	63.891	21.927	21.968	23.037	34.46	26.782	1.52354	4.6257	3.73343e-06	0.000729348
Os03t0826900-01	16.609	68.366	50.306	2.354	46.36	60.385	2.87066	3.51857	0.00043388	0.0420934
Os07t0126301-01	120.427	91.023	93.79	29.281	5.351	24.596	2.092	7.9023	2.7381e-15	2.05871e-12
Os10t0409400-01	393.252	747.403	1141.42	99.795	25.078	292.029	2.03029	14.0092	1.37022e-44	1.92311e-40
Os01t0384800-01	259.317	337.542	300.7	112.714	274.291	269.752	1.25393	8.03756	9.16424e-16	7.71721e-13
Os04t0679400-01	200.651	308.626	374.478	84.515	113.615	273.632	1.29929	7.26834	3.6392e-13	2.18898e-10
Os03t0701200-01	118.657	106.382	171.929	54.567	122.213	131.265	1.17257	5.15605	2.52215e-07	6.55525e-05
Os05t0591900-03	26.6	35.428	22.608	3.462	27.554	23.845	2.99363	4.54567	5.47599e-06	0.00103859
Os07t0680600-01	32.959	13.334	14.134	9.932	38.164	29.308	1.78239	3.71627	0.000202184	0.0224104
Os07t0125500-01	124.869	92.199	90.141	27.036	3.502	24.284	2.25934	8.44199	3.11991e-17	2.85574e-14
Os01t0949300-01	132.52	69.797	102.943	65.025	270.431	191.833	1.07902	5.09619	3.46566e-07	8.89765e-05
Os07t0129300-00	62.261	87.999	105.048	11.792	46.409	41.948	2.4524	6.25743	3.91379e-10	1.63158e-07
Os04t0685300-02	152.501	102.055	81.915	70.312	173.111	143.176	1.16885	5.83061	5.52259e-09	1.93774e-06
Os03t0764600-01	109.993	134.232	216.649	56.969	43.361	170.341	1.00104	4.36589	1.26606e-05	0.00204243
Os05t0567100-01	103.577	95.494	61.168	48.244	106.269	55.853	1.15416	4.75675	1.96734e-06	0.000418871
Os11t0113700-01	114.879	169.464	185.138	52.948	220.459	84.333	1.16934	5.06215	4.14552e-07	0.000105149
Os12t0555500-01	38.185	48.562	50.623	5.809	39.351	28.855	2.76852	5.23717	1.63058e-07	4.44753e-05
Os03t0291500-01	61.088	107.17	72.06	16.683	71.377	26.082	1.92439	5.32974	9.8356e-08	2.77938e-05
Os01t0975300-01	136.436	129.734	123.126	56.83	38.933	84.586	1.31538	6.05063	1.44284e-09	5.54103e-07
Os12t0555000-01	31.814	50.389	61.217	3.689	34.354	21.163	3.16024	5.09859	3.42187e-07	8.83914e-05
Os12t0113500-01	159.959	140.73	186.618	75.753	177.265	97.375	1.1302	5.81286	6.14159e-09	2.1196e-06
Os07t0489650-00	50.189	24.629	13.334	20.817	25.38	18.972	1.32149	3.68277	0.00023071	0.0247393
Os05t0380900-01	49.776	19.949	15.721	17.946	45.448	23.586	1.52366	4.08311	4.44364e-05	0.00615459
Os01t0615100-01	75.854	154.241	254.666	24.292	21.489	53.274	1.69462	5.44242	5.25612e-08	1.55851e-05
Os02t0609400-02	56.928	67.119	74.043	20.051	51.163	83.109	1.55734	4.43716	9.11518e-06	0.00157293
Os05t0125500-01	134.017	172.803	172.595	68.226	119.666	139.695	1.0259	4.91766	8.75867e-07	0.000201521
Os01t0714600-01	45.232	15.282	25.172	9.105	32.235	38.338	2.36449	5.22121	1.77761e-07	4.70732e-05
Os01t0855600-01	70.755	71.22	84.846	33.856	70.282	87.94	1.1153	3.82472	0.000130919	0.0156525
Os02t0584700-01	76.834	46.613	85.36	32.986	65.298	125.019	1.27177	4.42324	9.72333e-06	0.00165749

## Sheet: PEG_0h_down
List of down-regulated genes in transgenic rice plants OXR21 compared to wild type plants before PEG treatment
Gene_ID	OXR			WT			OXR 0h vs WT 0h
	0h	6h	24h	0h	6h	24h	normalized log2FC	z_score	P_value	FDR
Os10t0530500-01	30.947	5.88	1.59	85.591	20.565	6.6	-1.41578	-4.97875	6.39963e-07	0.00015486
Os06t0289900-01	49.946	9.499	47.973	141.683	25.522	61.425	-1.45235	-6.52977	6.58702e-11	3.15166e-08
Os06t0157000-01	155.85	780.609	311.1	343.584	1012.52	500.357	-1.08863	-8.11865	4.714e-16	4.13506e-13
Os09t0346500-04	565.497	1318.78	960.263	1248.06	2931.3	1467.48	-1.09022	-15.4986	3.54478e-54	7.46265e-50
Os10t0205700-01	33.69	30.492	104.31	75.507	19.993	143.356	-1.11241	-3.87258	0.000107691	0.0133363
Os09t0538000-04	1.336	1.137	27.777	68.378	37.808	79.996	-5.62566	-8.52517	1.52585e-17	1.55063e-14
Os01t0869800-01	367.727	157.543	145.614	772.971	300.821	224.607	-1.0199	-11.5477	7.58007e-31	2.2797e-27
Os01t0975900-01	11.766	44.198	31.11	45.957	88.281	68.411	-1.91378	-4.52367	6.07761e-06	0.0011424
Os06t0696400-01	18.286	154.522	33.268	52.714	218.69	147.692	-1.47557	-4.0302	5.57297e-05	0.00744921
Os04t0650700-04	41.871	3.994	6.784	107.045	82.592	17.384	-1.30232	-5.22341	1.75663e-07	4.70732e-05
Os08t0139700-01	175.498	13.585	30.794	423.176	105.101	70.393	-1.21793	-9.85716	6.38286e-23	1.03365e-19
Os01t0246400-01	37.075	4.797	26.753	132.85	1.874	36.813	-1.7894	-7.3483	2.00746e-13	1.22499e-10
Os03t0725200-01	130.652	53.662	119.11	293.896	102.008	311.401	-1.1177	-7.67027	1.71634e-14	1.1847e-11
Os09t0537700-02	8.771	38.487	94.937	132.915	182.905	272.771	-3.86974	-11.0839	1.50114e-28	3.95036e-25
Os06t0288300-01	43.095	3.045	9.432	90.31	4.094	13.101	-1.01549	-3.93171	8.43447e-05	0.0107943
Os01t0823600-01	87.221	7.501	6.921	275.122	33.928	17.766	-1.60545	-9.79552	1.17687e-22	1.83526e-19
Os04t0493100-01	42.372	202.946	59.837	95.174	515.696	56.516	-1.11558	-4.35778	1.31386e-05	0.00211145
Os06t0716700-01	5.653	40.973	90.695	44.198	6.507	58.481	-2.91502	-5.68083	1.34041e-08	4.40923e-06
Os09t0115500-01	46.998	127.193	88.702	110.989	280.846	44.32	-1.18787	-4.94854	7.47731e-07	0.000177871
Os06t0157125-00	24.615	189.784	57.586	60.419	169.814	83.287	-1.24359	-3.78554	0.000153376	0.0177903
Os04t0602100-01	42.841	11.118	22.286	151.078	52.365	58.277	-1.76635	-7.7663	8.08152e-15	5.86676e-12
Os01t0162200-00	38.433	216.857	32.028	85.262	354.596	30.803	-1.09768	-4.07103	4.68048e-05	0.00644025
Os09t0541000-01	16.457	51.857	12.436	53.433	110.054	20.888	-1.64715	-4.39672	1.09898e-05	0.00183011
Os12t0226900-01	84.336	16.707	15.817	222.761	30.799	32.422	-1.3494	-7.74449	9.59659e-15	6.84855e-12
Os04t0650700-02	111.648	53.708	23.053	305.611	155.856	56.949	-1.40086	-9.33372	1.02216e-20	1.44173e-17
Os01t0162400-01	37.628	188.626	38.146	111.93	214.73	49.015	-1.52084	-6.00571	1.90492e-09	7.1613e-07
Os07t0142900-01	30.072	210.046	70.845	101.767	559.936	132.474	-1.7069	-6.2232	4.87118e-10	1.95334e-07
Os01t0162300-01	88.376	584.006	94.994	249.239	1086.37	81.727	-1.44393	-8.62334	6.50281e-18	7.02053e-15
Os04t0473150-00	28.196	19.607	21.929	71.618	33.778	695.999	-1.29296	-4.2486	2.15112e-05	0.00325272
Os07t0162100-00	25.995	5.266	6.802	67.668	7.058	15.524	-1.32836	-4.21691	2.47677e-05	0.0036463
Os07t0178800-01	8.987	0.525	5.986	52.009	0.347	22.046	-2.48097	-5.65455	1.56258e-08	5.06095e-06
Os07t0687100-01	22.16	12.09	12.463	61.164	22.78	14.349	-1.41285	-4.20213	2.64418e-05	0.00385236
Os01t0575000-01	11.955	13.848	27.704	40.398	47.35	4.251	-1.70479	-3.91743	8.94968e-05	0.0113845
Os03t0692700-03	47.005	60.215	23.482	100.701	32.368	47.307	-1.04732	-4.25833	2.05959e-05	0.00315342
Os04t0509600-02	12.367	5.949	13.664	41.819	9.609	24.762	-1.70579	-3.98737	6.68087e-05	0.00873597
Os01t0600900-02	542.19	1029.04	665.718	1225.86	3475.89	1057.94	-1.12504	-15.7552	6.33004e-56	2.66526e-51
Os03t0782200-01	19.808	9.088	10.284	72.782	27.956	27.054	-1.82562	-5.51423	3.50316e-08	1.06116e-05
Os01t0557500-01	35.962	37.471	14.03	96.515	96.161	36.568	-1.3724	-5.16364	2.42196e-07	6.33396e-05
Os03t0161200-01	45.867	43.456	29.407	119.679	142.031	31.383	-1.33176	-5.61922	1.91817e-08	6.16524e-06
Os02t0122500-00	54.584	50.405	27.493	117.755	93.87	38.89	-1.05736	-4.64094	3.4683e-06	0.000688833
Os07t0178700-01	11.991	0	7.96	89.31	0.155	19.656	-2.84499	-7.97767	1.49121e-15	1.20745e-12
Os01t0720500-01	25.346	15.978	20.033	131.729	161.774	57.229	-2.32587	-8.66655	4.45396e-18	4.9351e-15
Os04t0690800-01	24.339	9.916	16.881	116.748	7.665	35.669	-2.21018	-7.91003	2.57327e-15	1.96996e-12
Os11t0645400-01	52.883	58.994	112.977	162.596	181.62	177.777	-1.56854	-7.40418	1.31963e-13	8.29299e-11
Os03t0701700-02	3.812	18.342	32.309	27.439	28.145	12.94	-2.79573	-4.38253	1.17311e-05	0.00191449
Os09t0266000-01	16.128	18.45	22.941	45.858	19.127	10.346	-1.45573	-3.72121	0.000198273	0.022242
Os07t0677400-00	22.244	26.462	15.165	63.964	32.911	15.958	-1.47197	-4.43142	9.36147e-06	0.0016023
Os06t0196300-01	30.08	37.737	39.747	96.901	54.073	24.205	-1.63583	-5.89186	3.81868e-09	1.35114e-06
Os07t0509800-01	11.869	10.572	5.981	39.923	14.613	9.844	-1.69815	-3.88362	0.000102913	0.0127822

## Sheet: PEG_6h_up
List of up-regulated genes in transgenic rice plants OXR21 compared to wild type plants at 6h of PEG treatment
Gene_ID	OXR			WT			OXR 6h vs WT 6h
	0h	6h	24h	0h	6h	24h	normalized log2FC	z_score	P_value	FDR
Os06t0688100-01	25.778	80.844	45.474	27.085	18.425	35.643	2.16406	6.58974	4.40604e-11	6.22539e-09
Os04t0390100-01	94.135	56.139	142.444	64.048	8.808	75.224	2.7027	6.24688	4.18727e-10	5.29444e-08
Os04t0218400-00	28.767	71.217	38.886	29.114	28.184	33.98	1.36793	4.48794	7.19143e-06	0.000471643
Os03t0826800-01	33.32	384.155	82.843	9.869	96.927	76.601	2.0173	13.737	6.09464e-43	5.1323e-40
Os08t0497600-01	59.064	137.282	105.034	65.078	61.728	115.667	1.18373	5.56709	2.59027e-08	2.54821e-06
Os06t0347966-01	28.424	82.746	29.201	25.722	25.934	23.125	1.70443	5.68618	1.29914e-08	1.35397e-06
Os05t0231700-01	224.354	786.139	212.83	260.647	230.633	203.889	1.79977	18.2087	4.40526e-74	6.62442e-71
Os12t0210400-01	130.425	96.584	195.463	80.462	46.13	185.744	1.09666	4.39177	1.12433e-05	0.000712949
Os11t0700900-02	0.583	49.999	11.126	0.98	2.528	4.842	4.33642	7.12675	1.02764e-12	1.77331e-10
Os01t0525700-01	93.92	34.501	30.476	81.363	13.143	22.075	1.42293	3.21843	0.00128894	0.0462249
Os04t0659300-01	143.083	327.657	108.643	92.16	43.452	94.389	2.94528	15.7704	4.97129e-56	5.10527e-53
Os02t0131100-01	50.135	113.4	65.591	38.077	43.007	41.745	1.42936	5.85497	4.77086e-09	5.27236e-07
Os01t0580500-01	4.1	26.799	22.563	3.68	7.274	12.137	1.91194	3.50167	0.000462354	0.0192366
Os04t0316200-01	17.64	19.202	55.231	13.941	2.973	34.816	2.72185	3.66712	0.000245302	0.0110229
Os10t0501500-01	141.419	72.296	100.437	93.701	34.568	79.163	1.09506	3.79511	0.000147575	0.00724202
Os09t0286600-02	3.645	48.893	8.563	1.169	5.243	7.923	3.25175	6.37751	1.79988e-10	2.36087e-08
Os06t0561000-01	314.493	104.668	120	233.91	16.388	28.264	2.70569	8.53492	1.40257e-17	3.64538e-15
Os10t0554200-02	8.338	71.417	22.631	13.535	21.228	46.315	1.78088	5.44689	5.12595e-08	4.78555e-06
Os02t0191300-01	31.41	53.758	110.633	18.319	15.329	69.715	1.8408	4.83423	1.33659e-06	9.90792e-05
Os03t0405500-01	176.256	77.531	136.679	73.573	39.134	80.9	1.01694	3.69948	0.00021604	0.0099197
Os04t0679400-02	210.584	701.341	641.236	146.838	240.509	644.723	1.57461	15.6455	3.56574e-55	3.49152e-52
Os10t0456800-01	58.036	221.466	138.591	28.778	99.764	124.296	1.18108	7.0586	1.68191e-12	2.82139e-10
Os03t0183000-03	4.871	41.096	9.608	2.593	4.431	4.596	3.24388	5.84073	5.19737e-09	5.69884e-07
Os03t0183000-02	7.159	40.848	23.4	2.11	9.158	18.493	2.18775	4.71594	2.40594e-06	0.00017083
Os03t0183000-01	15.654	191.556	59.158	9.157	15.545	37.438	3.65383	13.23	5.88942e-40	4.4281e-37
Os04t0340300-01	39.191	96.618	27.225	29.116	33.211	30.399	1.57122	5.79644	6.77377e-09	7.29436e-07
Os07t0529000-01	13.348	46.973	19.077	2.011	5.874	8.93	3.03	6.05294	1.42227e-09	1.70611e-07
Os06t0726200-02	11.651	48.266	31.551	12.247	14.141	22.37	1.80171	4.51384	6.36657e-06	0.000422815
Os07t0539300-01	24.018	79.332	60.963	13.486	37.02	46.943	1.13018	4.07812	4.54019e-05	0.00247623
Os10t0491400-01	37.69	30.676	101.922	18.509	10.029	59.966	1.64352	3.37378	0.000741438	0.0287461
Os05t0427300-03	57.9	128.145	105.632	63.905	64.01	107.471	1.03199	4.8141	1.47864e-06	0.000108843
Os01t0537250-01	44.236	83.712	31.489	6.567	13.338	11.989	2.68048	7.59477	3.0833e-14	6.45882e-12
Os05t0486100-01	20.13	61.389	53.93	18.441	31.159	41.34	1.00892	3.27047	0.00107369	0.0392088
Os11t0448700-01	31.584	61.881	21.037	31.944	27.567	22.246	1.19714	3.77109	0.000162535	0.00786614
Os09t0554200-01	4.008	27.688	8.169	1.664	6.083	4.382	2.21699	3.91465	9.05351e-05	0.00468302
Os06t0125800-01	201.567	149.476	293.086	133.614	67.006	231.958	1.18814	5.82629	5.66747e-09	6.18209e-07
Os07t0617000-02	25.882	200.456	108.326	26.93	63.641	90.229	1.68584	8.78242	1.60001e-18	4.55191e-16
Os07t0617000-01	38.287	101.987	51.723	22.339	25.536	21.926	2.02837	7.10247	1.22547e-12	2.08058e-10
Os09t0417800-01	98.957	38.406	117.979	77.88	14.4	54.788	1.44585	3.43671	0.000588822	0.0236568
Os11t0170900-01	41.677	65.55	23.805	33.357	28.84	26.591	1.21511	3.9273	8.59057e-05	0.00447219
Os05t0427200-01	7.75	36.767	17.818	9.476	14.66	29.745	1.35711	3.20511	0.00135009	0.0477292
Os11t0247000-02	2.956	33.646	15.358	9.029	3.82	6.837	3.16938	5.23057	1.68987e-07	1.45803e-05
Os11t0247000-01	37.349	86.694	64.831	45.264	11.315	42.246	2.96828	8.14232	3.87764e-16	9.17236e-14
Os02t0736400-01	57.712	207.209	155.724	47.689	75.112	122.536	1.49456	8.18283	2.77254e-16	6.67074e-14
Os04t0688300-01	69.8	146.548	79.954	35.559	15.853	24.28	3.23913	11.0227	2.96925e-28	1.37385e-25
Os01t0141000-01	275.768	781.39	563.833	249.853	221.662	548.994	1.84827	18.4866	2.64697e-76	4.45803e-73
Os05t0344200-01	519.152	1104.51	990.556	502.749	514.071	956.217	1.13396	15.2652	1.30385e-52	1.2477e-49
Os05t0171900-01	37.803	162.409	140.641	31.102	54.605	104.671	1.60311	7.62564	2.42818e-14	5.13761e-12
Os01t0124000-01	9.431	69.189	60.876	14.352	24.246	28.107	1.54338	4.84148	1.28877e-06	9.60418e-05
Os03t0206400-02	119.401	58.45	90.149	131.477	26.343	74.463	1.18037	3.62422	0.00028983	0.0127783
Os06t0727200-01	32.198	77.43	37.061	19.244	30.791	22.177	1.36097	4.66143	3.14015e-06	0.000217819
Os01t0348900-01	59.351	882.371	160.563	40.778	148.49	126.748	2.6016	24.2669	4.38529e-130	1.84643e-126
Os03t0398600-00	19.965	63.609	41.499	24.159	19.126	33.247	1.76428	5.10725	3.26883e-07	2.73084e-05
Os10t0505700-01	65.13	145.789	74.262	72.321	74.131	92.964	1.00632	5.02946	4.91854e-07	3.98259e-05
Os07t0671000-00	10.176	41.338	26.924	2.981	15.972	10.699	1.40251	3.48468	0.000492717	0.0202794
Os05t0449500-01	132.149	272.145	283.868	85.702	135.409	210.139	1.03764	7.04758	1.82053e-12	3.02977e-10
Os10t0364900-01	65.721	175.641	113.815	47.795	77.586	75.634	1.20935	6.4049	1.50469e-10	1.99858e-08
Os11t0246200-00	137.924	327.434	236.204	147.037	136.765	217.732	1.29009	9.19991	3.58245e-20	1.14272e-17
Os02t0533800-01	212.109	550.044	746.765	125.76	191.549	758.285	1.55242	13.712	8.59934e-43	7.09952e-40
Os02t0783625-00	46.94	108.777	101.437	25.097	29.872	59.376	1.89509	7.01328	2.3279e-12	3.84377e-10
Os10t0576600-01	13.038	196.212	72.078	12.523	32.551	63.118	2.62222	11.4905	1.47207e-30	7.65203e-28
Os10t0576600-02	2.632	44.762	19.955	5.262	9.475	17.99	2.27066	5.05073	4.40135e-07	3.60543e-05
Os02t0176000-00	45.623	142.055	111.003	49.192	53.758	108.949	1.43248	6.56394	5.24047e-11	7.33056e-09
Os05t0209600-01	25.977	72.979	28.89	34.04	31.705	50.539	1.23336	4.19283	2.75491e-05	0.00158248
Os05t0453500-01	7.796	48.073	18.325	5.99	7.518	15.391	2.70739	5.78603	7.20703e-09	7.72142e-07
Os03t0648400-01	1.755	28.036	5.344	8.015	2.8	7.556	3.35437	4.89389	9.88602e-07	7.55446e-05
Os06t0148200-01	37.58	32.351	3.084	48.37	6.904	6.554	2.25889	4.28026	1.86678e-05	0.00112497
Os04t0451200-02	21.734	75.716	73.711	23.169	15.479	69.666	2.32087	6.65606	2.81271e-11	4.0282e-09
Os03t0305100-01	69.4	78.836	177.928	33.871	38.642	182.145	1.05927	3.85738	0.000114608	0.00577912
Os04t0649500-01	29.431	88.001	48.431	17.569	28.467	71.464	1.65881	5.75233	8.80236e-09	9.3356e-07
Os02t0525600-01	155.76	647.89	362.907	119.013	326.081	434.375	1.0211	10.7335	7.08297e-27	3.04315e-24
Os11t0454300-01	15.073	170.952	57.288	22.095	16.724	11.525	3.38418	12.1296	7.35944e-34	4.36435e-31
Os12t0638300-01	14.392	60.422	66.863	19.766	27.256	46.656	1.17909	3.68167	0.000231711	0.010513
Os02t0131100-02	85.888	186.376	120.17	89.557	83.968	95.36	1.18089	6.47436	9.52121e-11	1.2808e-08
Os04t0223500-01	2.511	56.79	5.311	0.248	7.837	0.176	2.88785	6.50143	7.95581e-11	1.0876e-08
Os10t0150600-01	51.965	33.263	0.442	53.717	1.164	0.931	4.86734	5.95107	2.66398e-09	3.03153e-07
Os10t0370500-01	41.961	116.295	113.236	33.152	21.367	73.354	2.47492	8.56496	1.08115e-17	2.82745e-15
Os09t0412400-01	94.367	268.836	248.819	98.134	70.339	203.328	1.96491	11.2948	1.39148e-29	6.89274e-27
Os09t0397300-01	79.108	229.099	133.923	71.007	80.683	97.843	1.53622	8.78051	1.62732e-18	4.59855e-16
Os01t0962700-01	38.515	97.137	42.59	28.786	45.855	49.422	1.11353	4.459	8.2344e-06	0.00053258
Os02t0684400-01	163.61	102.674	217.821	143.23	41.779	225	1.32781	5.26723	1.38496e-07	1.21995e-05
Os06t0129400-01	170.003	116.61	437.358	99.754	25.481	339.592	2.22478	8.05129	8.19264e-16	1.89534e-13
Os04t0531900-01	15.807	65.488	39.254	10.646	32.342	42.631	1.04841	3.48617	0.000489982	0.0201866
Os06t0125200-01	8.788	37.036	16.445	10.825	9.395	13.233	2.00955	4.2541	2.09896e-05	0.00124682
Os05t0549800-01	4.625	35.716	13.735	6.828	11.987	11.855	1.60569	3.58	0.000343596	0.0147473
Os09t0287000-01	0.742	84.377	6.129	0.133	9.966	3.048	3.11235	8.21497	2.1221e-16	5.13511e-14
Os11t0256900-01	304.343	763.157	814.203	169.923	289.719	813.272	1.42791	15.1816	4.67975e-52	4.2835e-49
Os01t0192900-00	16.533	51.305	70.565	17.74	10.833	74.446	2.27425	5.41247	6.21604e-08	5.72705e-06
Os08t0536300-01	32.636	81.084	47.748	24.817	38.698	32.943	1.09774	4.02714	5.64588e-05	0.0030399
Os11t0677101-00	33.887	28.551	69.687	7.446	1.886	23.102	3.95072	5.24557	1.55802e-07	1.35538e-05
Os04t0688100-02	70.034	80.058	168.628	41.899	22.353	116.901	1.87116	5.9653	2.44181e-09	2.79381e-07
Os01t0881300-02	17.588	74.257	29.081	33.067	37.78	31.057	1.00549	3.58688	0.00033466	0.0144374
Os06t0559400-01	33.28	133.267	96.26	30.269	42.5	78.19	1.67937	7.14119	9.25273e-13	1.60986e-10
Os10t0150400-01	60.098	43.487	0.229	74.468	0.829	1.608	5.74365	6.89829	5.26333e-12	8.42632e-10
Os03t0848700-01	14.178	67.239	48.685	4.83	12.325	26.244	2.4783	6.51759	7.14472e-11	9.86322e-09
Os01t0644000-01	59.137	166.314	75.848	35.966	67.88	64.024	1.32344	6.68693	2.27904e-11	3.29757e-09
Os12t0242100-01	41.957	937.969	216.174	30.005	193.707	87.085	2.30625	23.3451	1.54563e-120	5.00605e-117
Os07t0539100-02	2.506	16.517	53.2	1.471	0.463	6.874	5.18738	4.22814	2.35628e-05	0.00137793
Os07t0539100-01	49.429	131.72	125.979	25.974	10.461	43.4	3.68497	11.0046	3.6314e-28	1.66196e-25
Os03t0218400-01	72.099	55.732	134.764	66.853	27.538	76.792	1.04767	3.21416	0.00130826	0.0466817
Os03t0297600-01	103.254	363.732	311.774	72.404	93.673	368.944	1.98776	13.2386	5.25109e-40	4.01995e-37
Os06t0695500-01	20.168	155.337	39.377	20.808	34.795	55.168	2.18903	9.20018	3.57355e-20	1.14272e-17
Os12t0559200-01	12.413	46.085	116.828	23.062	8.435	13.28	2.48042	5.39841	6.7235e-08	6.14084e-06
Os12t0245700-01	4.898	34.462	7.197	7.122	3.975	13.329	3.14656	5.27634	1.31793e-07	1.16578e-05
Os10t0419400-01	26.729	88.903	135.516	3.611	1.8	16.32	5.65675	9.86145	6.11604e-23	2.23927e-20
Os02t0228300-01	113.803	90.033	177.703	38.876	31.991	131.535	1.52337	5.4702	4.49531e-08	4.20611e-06
Os11t0210300-01	31.977	176.393	135.859	29.049	58.459	104.008	1.62388	8.02125	1.04676e-15	2.40841e-13
Os01t0143900-01	30.286	105.938	82.063	23.957	49.906	60.371	1.11652	4.66674	3.06024e-06	0.00021333
Os03t0183200-01	68.548	297.279	195.107	71.818	108.405	186.769	1.48597	9.75984	1.6742e-22	5.87436e-20
Os11t0618700-01	22.8	22.504	85.898	12.387	2.55	27.742	3.1722	4.27942	1.87378e-05	0.00112708
Os03t0700700-01	31.972	86.57	72.886	35.484	44.197	57.808	1.0005	3.85701	0.000114782	0.00578098
Os08t0452900-01	14.267	100.477	86.883	13.863	42.993	83.04	1.25528	4.98826	6.09264e-07	4.822e-05
Os06t0716700-01	5.653	40.973	90.695	44.198	6.507	58.481	2.68519	5.3183	1.04739e-07	9.42316e-06
Os11t0427800-01	13.143	52.359	48.913	11.687	16.083	40.063	1.73349	4.57711	4.71434e-06	0.000321714
Os04t0688500-01	75.866	458.082	276.148	42.279	71.208	123.695	2.71608	17.8933	1.33069e-71	1.86762e-68
Os02t0601300-01	51.459	141.48	218.3	48.651	59.1	218.237	1.28995	6.04639	1.48131e-09	1.76188e-07
Os09t0286600-03	2.285	42.319	8.712	1.427	4.148	7.018	3.3814	6.03278	1.61166e-09	1.90081e-07
Os08t0189900-00	53.538	48.442	123.491	35.149	15.948	85.787	1.63347	4.22109	2.43129e-05	0.0014159
Os10t0401000-01	44.01	161.123	85.711	37.209	80.147	124.392	1.03803	5.42411	5.82453e-08	5.4018e-06
Os03t0293500-02	13.521	53.855	39.733	11.797	26.174	40.828	1.07153	3.2182	0.00128997	0.0462249
Os03t0103300-00	15.164	112.123	28.938	14.32	28.713	24.182	1.99589	7.36921	1.71648e-13	3.28511e-11
Os07t0290200-01	9.289	55.119	48.468	12.757	21.159	30.385	1.41186	4.04413	5.25176e-05	0.00283858
Os07t0603300-01	41.082	99.837	68.91	44.49	49.07	46.101	1.05532	4.32768	1.50689e-05	0.000926242
Os10t0150800-01	50.742	34.163	0	67.586	0.872	0.676	5.32255	6.09484	1.09549e-09	1.33698e-07
Os06t0202700-01	4.295	31.289	14.329	2.654	4.989	9.434	2.67942	4.64214	3.44817e-06	0.000238399
Os05t0525900-01	45.661	194.121	107.324	27.042	64.523	69.586	1.61966	8.39899	4.50324e-17	1.13538e-14
Os04t0418800-02	17.825	50.976	10.835	22.391	16.749	19.789	1.63633	4.33552	1.45418e-05	0.00089909
Os10t0150700-01	41.04	22.2	0	47.665	0.214	0.457	6.72739	4.86812	1.12662e-06	8.54712e-05
Os07t0169600-01	21.453	76.521	37.251	17.072	38.554	37.209	1.01956	3.68311	0.000230402	0.0104763
Os11t0639300-01	5.64	33.782	12.383	6.127	12.829	6.584	1.42743	3.1923	0.00141144	0.049648
Os04t0486950-01	30.456	288.796	186.725	8.223	45.975	148.21	2.68171	14.1107	3.26186e-45	2.86127e-42
Os12t0247700-01	17.741	131.335	187.916	12.206	8.865	12.718	3.91957	11.2224	3.16462e-29	1.53157e-26
Os09t0487900-01	37.644	127.55	100.851	31.832	50.719	104.119	1.36105	5.98322	2.18775e-09	2.5237e-07
Os09t0530300-01	14.68	91.247	26.924	7.362	32.312	24.996	1.52829	5.52003	3.38936e-08	3.27314e-06
Os03t0244200-02	24.419	249.221	123.494	27.834	86.021	91.865	1.56525	9.28431	1.62764e-20	5.27167e-18
Os01t0124700-01	33.395	100.276	56.106	36.986	27.948	36.973	1.87374	6.68246	2.34959e-11	3.388e-09
Os05t0542500-02	12.566	79.965	42.286	11.282	7.978	8.267	3.35585	8.2667	1.37717e-16	3.37126e-14
Os06t0156600-01	128.675	175.151	49.932	174.737	76.84	82.191	1.21926	6.4373	1.2162e-10	1.62566e-08
Os11t0634200-01	126.653	351.393	175.616	151.815	175.666	122.69	1.03084	7.96544	1.64631e-15	3.74691e-13
Os03t0765400-02	76.71	227.926	174.833	56.869	74.751	126.303	1.63899	9.17892	4.35449e-20	1.37854e-17
Os11t0139700-01	392.362	245.221	722.976	298.87	108.502	603.294	1.20695	7.55632	4.14629e-14	8.55782e-12
Os02t0662100-01	8.379	35.813	1.97	8.383	3.4	1.14	3.42746	5.58057	2.3973e-08	2.36944e-06
Os01t0560000-01	35.232	94.008	69.772	32.444	37.632	55.765	1.35141	5.10868	3.2442e-07	2.71565e-05
Os03t0192500-01	162.335	91.113	187.366	115.165	33.908	142.868	1.45662	5.32299	1.02074e-07	9.20302e-06
Os07t0551400-01	56.95	135.534	147.683	52.487	58.902	144.836	1.23285	5.71223	1.11503e-08	1.17078e-06
Os05t0473000-01	13.082	52.598	68.202	5.184	1.756	43.296	4.93523	7.49905	6.4281e-14	1.30123e-11
Os01t0963000-01	37.108	60.963	171.129	19.126	2.649	68.136	4.555	7.95888	1.73601e-15	3.90882e-13
Os01t0159000-01	6.671	98.626	75.798	1.401	19.434	34.449	2.37397	7.69928	1.36836e-14	2.98522e-12
Os06t0553200-01	63.779	46.551	8.089	85.117	10.313	16.623	2.20493	5.05887	4.21749e-07	3.4751e-05
Os06t0618700-01	97.299	363.076	290.25	66.772	157.301	275.244	1.23733	9.37702	6.78637e-21	2.23235e-18
Os08t0460000-01	39.779	94.841	24.879	49.244	25.874	11.459	1.90459	6.5706	5.01117e-11	7.03318e-09
Os01t0303800-02	55.716	190.781	164.045	16.543	30.523	103.983	2.67453	11.4521	2.29509e-30	1.17847e-27
Os01t0124100-01	77.193	47.948	150.561	64.426	9.727	50.871	2.33199	5.31182	1.08536e-07	9.72323e-06
Os07t0598200-01	57.644	155.055	128.146	38.015	62.683	114.886	1.33722	6.50826	7.60256e-11	1.0461e-08
Os12t0210500-00	6.262	34.927	11.173	8.625	1.543	6.192	4.53112	6.01745	1.77191e-09	2.08398e-07
Os06t0220000-01	63.61	145.604	144.158	92.887	53.898	176.081	1.46433	6.75579	1.42057e-11	2.15931e-09
Os07t0537500-01	34.376	82.284	139.36	33.165	17.436	95.048	2.26913	6.84517	7.63864e-12	1.20009e-09
Os10t0450900-02	341.736	857.849	886.796	179.1	159.108	289.814	2.4613	23.1942	5.21333e-119	1.56791e-115
Os11t0671100-01	76.102	177.636	179.497	94.318	83.735	173.081	1.11561	6.03923	1.54854e-09	1.83666e-07
Os11t0227200-01	43.217	22.573	72.695	16.626	5.935	33.22	1.95786	3.26483	0.00109528	0.0399625
Os06t0605900-01	69.763	241.392	207.42	56.801	44.844	138.01	2.45898	12.2947	9.67695e-35	5.99188e-32
Os05t0398000-01	18.884	56.832	64.033	14.911	14.729	45.086	1.97863	5.2166	1.82235e-07	1.56592e-05
Os07t0683200-01	60.153	74.162	101.355	36.447	21.663	74.083	1.80603	5.60449	2.08875e-08	2.09897e-06
Os08t0202300-02	126.905	105.802	164.343	77.634	40.638	107.437	1.41105	5.6007	2.13487e-08	2.13006e-06
Os07t0126301-01	120.427	91.023	93.79	29.281	5.351	24.596	4.11894	9.48443	2.43717e-21	8.08008e-19
Os08t0416000-01	125.583	253.181	209.36	102.125	71.642	239.266	1.85188	10.5348	5.97055e-26	2.44068e-23
Os09t0437500-01	210.424	174.41	128.132	159.058	77.924	154.98	1.19293	6.3137	2.72437e-10	3.51869e-08
Os06t0715500-01	44.531	94.048	83.298	80.864	35.688	81.673	1.42854	5.32969	9.8379e-08	8.88894e-06
Os01t0222600-01	381.789	428.694	745.19	341.533	173.622	779.111	1.33458	10.8067	3.20084e-27	1.40387e-24
Os10t0409400-01	393.252	747.403	1141.42	99.795	25.078	292.029	4.92798	28.2648	9.36056e-176	7.88253e-172
Os07t0686300-01	16.686	45.858	50.013	10.363	10.412	48.838	2.16951	4.97083	6.66674e-07	5.237e-05
Os06t0220100-01	59.254	118.605	144.475	72.462	44.04	175.707	1.45986	6.08338	1.17673e-09	1.42784e-07
Os03t0270000-01	121.701	142.968	233.564	92.698	55.028	137.511	1.40804	6.50011	8.02593e-11	1.09363e-08
Os05t0384300-01	23.706	19.446	50.687	8.045	3.456	36.23	2.52288	3.54057	0.000399261	0.0169294
Os08t0155400-01	45.825	63.799	73.81	58.511	21.879	52.594	1.57457	4.71745	2.38819e-06	0.000169856
Os07t0204100-01	85.724	174.378	147.219	79.79	82.49	180.446	1.11051	5.96152	2.49908e-09	2.85159e-07
Os03t0367900-02	52.122	66.372	89.419	47.29	26.411	85.939	1.36002	4.31344	1.60733e-05	0.000985105
Os04t0679400-01	200.651	308.626	374.478	84.515	113.615	273.632	1.47229	9.87625	5.27708e-23	1.9663e-20
Os06t0698748-02	115.129	168.134	192.795	78.263	71.049	194.978	1.27331	6.52521	6.7906e-11	9.4052e-09
Os06t0698748-01	64.485	95.408	99.201	45.328	27.326	84.732	1.83442	6.42507	1.31808e-10	1.75626e-08
Os04t0645700-01	42.992	61.416	80.128	33.759	18.953	67.982	1.72677	4.94377	7.66245e-07	5.95254e-05
Os06t0698674-01	105.074	97.628	135.986	79.095	47.028	103.023	1.08436	4.37522	1.21309e-05	0.000762342
Os01t0924400-01	69.755	80.585	89.479	49.033	39.709	91.111	1.05163	3.87694	0.000105777	0.00535525
Os01t0575000-02	92.726	73.899	81.778	56.855	29.591	101.272	1.35098	4.52831	5.94569e-06	0.000398002
Os05t0386800-01	68.588	45.277	37.739	83.071	14.404	31.894	1.68289	4.16848	3.06639e-05	0.00174709
Os04t0364800-00	38.259	55.823	64.834	35.424	24.515	69.219	1.21778	3.63048	0.000282891	0.0124855
Os01t0326300-01	61.97	69.152	99.195	67.596	18.644	87.236	1.92164	5.64408	1.66069e-08	1.68897e-06
Os05t0429100-01	24.361	37.329	31.183	21.665	6.259	41.399	2.60688	4.99558	5.8659e-07	4.66007e-05
Os01t0681700-00	38.687	49.527	41.397	33.58	18.955	58.236	1.41622	3.84242	0.000121826	0.00608481
Os01t0124200-02	365.517	357.982	644.065	304.976	101.048	235.521	1.85543	12.5437	4.30634e-36	2.78951e-33
Os12t0477400-01	59.489	84.478	111.002	35.575	27.083	77.153	1.67177	5.66729	1.45077e-08	1.49717e-06
Os03t0132200-01	200.756	248.804	290.647	191.256	87.402	270.188	1.53986	9.16629	4.89561e-20	1.51566e-17
Os02t0692700-01	38.416	43.073	79.307	37.593	17.23	63.884	1.35245	3.45998	0.000540211	0.022019
Os03t0138700-01	47.81	42.313	57.751	36.295	18.171	60.382	1.25005	3.22642	0.00125348	0.0450706
Os02t0120600-01	48.065	40.047	66.662	24.535	15.216	69.665	1.42669	3.47438	0.000512029	0.0209922
Os11t0549620-01	22.427	17.383	2.54	26.923	1.058	6.355	4.06885	4.12998	3.62788e-05	0.00203128
Os02t0115900-03	32.819	31.224	48.844	44.973	10.737	69.581	1.57065	3.2942	0.000987006	0.0365505
Os09t0545300-01	60.93	62.084	81.67	49.156	23.275	73.242	1.44603	4.36996	1.24267e-05	0.00077861
Os04t0546800-01	95.864	178.074	125.855	91.32	54.44	112.514	1.74032	8.46473	2.56751e-17	6.55182e-15
Os08t0203201-00	28.955	60.443	109.751	17.266	6.178	66.061	3.32095	7.15549	8.33748e-13	1.46883e-10
Os02t0533700-01	23.237	53.028	57.024	21.172	10.724	57.57	2.3365	5.59256	2.23744e-08	2.21664e-06
Os01t0135900-02	402.477	356.951	559.46	500.414	164.641	450.331	1.14699	8.75475	2.04552e-18	5.74178e-16
Os01t0885300-01	59.989	73.701	87.168	45.754	21.865	71.581	1.78365	5.53923	3.03799e-08	2.94734e-06
Os12t0106200-01	10.661	22.981	23.132	10.967	4.882	27.285	2.26548	3.61392	0.000301604	0.0132006
Os06t0306300-01	71.757	40.357	56.074	55.55	10.752	58.178	1.9388	4.33725	1.44279e-05	0.000894762
Os03t0231600-01	135.581	88.238	134.558	75.743	30.884	74.345	1.54513	5.47205	4.44857e-08	4.17165e-06
Os06t0547400-01	79.512	103.117	175.801	49.631	31.082	89.14	1.76072	6.49366	8.37758e-11	1.13317e-08
Os01t0731100-01	36.916	30.076	69.007	24.007	7.237	43.054	2.08573	3.92673	8.61089e-05	0.00447219
Os09t0323500-01	24.175	21.576	4.533	21.761	2.269	3.417	3.27988	4.25241	2.11486e-05	0.00125417
Os01t0888900-01	144.008	221.007	259.86	88.859	94.937	241.013	1.24963	7.37244	1.67527e-13	3.23566e-11
Os04t0402700-01	115.511	101.259	100.866	107.019	48.64	100.854	1.08842	4.46939	7.84438e-06	0.000508135
Os12t0114800-01	65.241	46.794	20.314	86.049	4.404	20.906	3.44002	6.38848	1.67539e-10	2.21135e-08
Os01t0219300-01	16.359	14.048	22.221	21.628	1.449	15.331	3.30782	3.44379	0.00057362	0.0231263
Os07t0125500-01	124.869	92.199	90.141	27.036	3.502	24.284	4.74909	9.86731	5.769e-23	2.13073e-20
Os03t0749500-01	63.943	36.578	71.145	51.84	12.591	54.053	1.56917	3.56303	0.000366604	0.0156392
Os07t0119300-01	75.489	97.721	103.388	64.244	48.914	104.04	1.02901	4.1939	2.74204e-05	0.00157723
Os05t0542732-00	14.624	29.778	39.643	18.606	9.538	40.359	1.67307	3.36652	0.000761232	0.0293245
Os07t0517100-03	42.276	48.844	81.143	38.248	17.796	101.491	1.48721	3.95812	7.55429e-05	0.00397592
Os01t0729900-02	47.494	65.958	121.024	22.444	24.791	96.466	1.44232	4.49559	6.93788e-06	0.000457868
Os03t0686500-01	47.469	33.531	58.483	41.249	9.974	55.724	1.77984	3.73068	0.000190967	0.00893407
Os10t0558700-02	18.006	18.841	33.486	6.703	3.474	37.575	2.46979	3.44325	0.000574763	0.0231361
Os10t0558700-01	21.932	29.465	43.717	13.168	4.599	32.379	2.7102	4.53231	5.83428e-06	0.00039179
Os04t0688100-01	107.39	120.411	182.305	81.738	26.496	166.848	2.21471	8.15864	3.38805e-16	8.05953e-14
Os02t0167300-01	133.525	91.361	120.705	86.032	41.085	81.191	1.18355	4.54088	5.60195e-06	0.000376789
Os03t0797500-01	14.742	15.007	26.824	27.451	2.386	7.354	2.68355	3.21756	0.00129288	0.0462503
Os11t0605100-01	88.714	149.328	175.386	50.749	51.886	105.438	1.55565	7.15419	8.4166e-13	1.47659e-10
Os08t0203150-00	13.483	29.549	48.283	8.184	3.684	25.825	3.03435	4.80405	1.55491e-06	0.000113889
Os05t0115800-01	43.223	43.71	77.441	34.102	15.774	61.117	1.501	3.77001	0.000163242	0.0078913
Os06t0655500-01	70.174	131.786	169.23	80.092	51.85	204.47	1.37637	6.13391	8.57472e-10	1.05259e-07
Os10t0207400-01	46.096	57.807	80.33	27.976	21.611	66.931	1.45006	4.22556	2.38344e-05	0.00139188
Os01t0309451-01	63.743	60.184	75.491	66.87	25.435	88.918	1.27315	3.9034	9.48519e-05	0.00485856
Os05t0380200-01	57.979	115.944	107.633	32.732	43.997	94.865	1.42854	5.91772	3.26443e-09	3.65555e-07
Os05t0553400-01	54.284	39.912	82.18	31.398	16.259	55.641	1.32617	3.28079	0.00103515	0.0379331
Os03t0382100-01	22.861	53.454	42.738	22.9	10.549	40.268	2.37178	5.66502	1.47003e-08	1.51334e-06
Os06t0106800-01	24.929	14.766	21.789	33.026	2.117	13.765	2.83277	3.28308	0.00102679	0.0377579
Os04t0673300-01	22.587	13.115	42.995	9.926	1.6	22.583	3.06566	3.21603	0.00129977	0.0464181
Os02t0730000-02	16.071	35.363	14.859	4.741	2.917	39.229	3.63027	5.67069	1.42223e-08	1.47132e-06
Os08t0102700-01	118.399	91.725	111.568	110.852	37.766	108.931	1.31081	4.92923	8.25559e-07	6.40151e-05
Os02t0668500-01	53.973	53.573	81.928	51.48	19.584	78.822	1.48242	4.13537	3.54378e-05	0.00198683
Os10t0376900-01	15.058	42.745	32.033	13.351	1.643	19.629	4.73194	6.71421	1.89088e-11	2.79352e-09
Os08t0120500-01	91.328	100.216	155.616	52.589	43.236	117.067	1.24339	4.94478	7.62282e-07	5.94327e-05
Os08t0345700-01	23.361	54.528	60.095	15.178	22.678	60.818	1.29629	3.76783	0.000164671	0.00792785
Os12t0583500-01	30.691	28.256	32.543	26.505	8.405	39.717	1.77982	3.42465	0.000615589	0.0245449
Os04t0322100-01	14.544	16.73	38.638	8.602	2.344	24.009	2.86598	3.51529	0.000439277	0.0183855
Os12t0515600-01	67.355	107.034	108.349	69.83	43.315	98.77	1.33572	5.40254	6.57036e-08	6.01402e-06
Os04t0371000-00	44.21	42.76	54.338	30.521	12.035	43.746	1.85961	4.34133	1.41623e-05	0.000880802
Os03t0243900-01	32.974	26.744	17.166	41.098	7.782	13.73	1.81159	3.37261	0.000744598	0.0288391
Os06t0147100-01	254.24	288.012	407.831	215.867	92.934	479.85	1.66244	10.4235	1.93622e-25	7.83888e-23
Os01t0132000-01	103.999	146.306	145.681	160.921	65.983	122.833	1.17941	5.73048	1.00147e-08	1.05417e-06
Os06t0264500-01	18.909	45.438	43.496	20.507	15.284	48.167	1.60246	4.03211	5.52773e-05	0.00298391
Os12t0618800-01	57.209	51.512	50.55	54.55	19.973	57.558	1.39744	3.87931	0.000104753	0.00532039
Os07t0672500-02	73.181	121.415	134.873	58.845	52.739	132.409	1.23359	5.40903	6.33664e-08	5.82542e-06
Os05t0110900-01	80.05	136.139	150.143	69.729	51.872	113.255	1.42264	6.39252	1.63173e-10	2.1605e-08
Os01t0595600-01	63.955	80.218	146.749	65.777	27.588	105.049	1.57047	5.27977	1.29345e-07	1.14654e-05
Os07t0677200-01	30.384	69.813	127.973	32.393	10.172	84.797	2.80948	7.10873	1.17113e-12	2.00448e-10
Os02t0603600-01	55.383	76.997	107.122	43.345	21.453	87.877	1.87421	5.85657	4.72513e-09	5.24938e-07
Os08t0364900-00	87.081	77.191	148.237	103.162	29.875	117.339	1.40008	4.75564	1.97819e-06	0.000142136
Os07t0106200-02	40.591	82.177	105.426	32.1	29.094	80.934	1.5286	5.23926	1.61224e-07	1.39678e-05
Os03t0817800-01	34.091	18.209	10.125	25.127	3.892	19.942	2.25665	3.20926	0.00133077	0.0472446
Os06t0521500-01	22.631	20.442	40.078	9.79	2.453	23.496	3.0895	4.02966	5.5857e-05	0.00301134
Os05t0420000-01	48.149	75.569	90.28	38.012	37.33	90.246	1.04804	3.74386	0.000181216	0.00856354
Os03t0764600-01	109.993	134.232	216.649	56.969	43.361	170.341	1.66084	7.11073	1.15431e-12	1.98376e-10
Os02t0273000-01	40.069	59.243	85.384	29.207	24.803	67.826	1.28672	3.90483	9.42905e-05	0.00483569
Os11t0186200-01	100.441	165.457	198.578	75.976	81.029	196.281	1.06053	5.59389	2.2204e-08	2.20495e-06
Os01t0184100-01	10.819	24.048	35.478	5.303	5.559	50.652	2.1436	3.57265	0.000353393	0.0151369
Os07t0143200-00	37.344	75.186	72.379	24.164	14.808	79.047	2.37467	6.7235	1.77415e-11	2.6303e-09
Os04t0644400-01	20.843	30.655	7.626	30.305	3.993	17.778	2.97116	4.84398	1.27261e-06	9.51552e-05
Os10t0109300-01	131.51	96.545	68.376	106.679	25.718	62.95	1.93901	6.70903	1.95924e-11	2.88439e-09
Os04t0608100-01	156.731	223.934	337.718	120.686	112.066	292.238	1.02931	6.35063	2.14432e-10	2.78662e-08
Os02t0532500-01	48.145	92.889	117.926	40.688	36.402	105.823	1.38208	5.16589	2.39301e-07	2.0314e-05
Os01t0975300-01	136.436	129.734	123.126	56.83	38.933	84.586	1.76708	7.30202	2.83474e-13	5.35233e-11
Os04t0489600-02	77.643	105.077	171.706	40.508	26.302	131.492	2.02879	7.21024	5.58526e-13	1.0093e-10
Os11t0115100-01	59.918	37.09	9.578	71.741	6.335	24.167	2.5802	4.95144	7.36663e-07	5.77602e-05
Os01t0263300-01	48.11	37.927	11.337	36.808	14.435	17.834	1.42424	3.37679	0.000733365	0.0284593
Os01t0860450-01	61.089	94.162	123.683	52.718	47.317	87.088	1.02337	4.09827	4.16257e-05	0.00229105
Os04t0674700-01	12.077	30.457	52.863	5.562	8.219	30.44	1.92032	3.74394	0.000181158	0.00856354
Os07t0539900-01	28.736	46.699	76.222	9.984	6.206	18.378	2.94224	5.95026	2.67713e-09	3.03829e-07
Os04t0169100-02	21.04	55.123	59.872	14.581	17.843	40.414	1.65788	4.55078	5.34466e-06	0.000361215
Os01t0615100-01	75.854	154.241	254.666	24.292	21.489	53.274	2.8741	10.6892	1.14306e-26	4.86148e-24
Os02t0141100-00	16.747	41.851	38.244	11.329	15.142	44.49	1.49729	3.68222	0.000231216	0.010502
Os04t0565500-01	32.785	58.172	56.068	24.301	27.359	63.237	1.11889	3.464	0.000532206	0.0217559
Os01t0239700-01	20.733	45.784	55.417	12.677	16.534	46.926	1.49999	3.8565	0.000115022	0.00578613

## Sheet: PEG_6h_down
List of down-regulated genes in transgenic rice plants OXR21 compared to wild type plants at 6h of PEG treatment
Gene_ID	OXR			WT			OXR 6h vs WT 6h
	0h	6h	24h	0h	6h	24h	normalized log2FC	z_score	P_value	FDR
Os07t0628700-01	3.029	56.972	1.829	4.181	134.529	5.673	-1.20901	-5.54496	2.94027e-08	2.88578e-06
Os06t0264800-01	401.932	185.14	213.973	614.025	431.46	369.16	-1.19002	-9.80793	1.04083e-22	3.71393e-20
Os01t0866400-01	350.604	68.416	69.516	575.707	150.837	119.769	-1.11	-5.48395	4.1593e-08	3.92662e-06
Os02t0829850-00	87.802	17.961	27.179	135.568	53.02	58.54	-1.53108	-4.16892	3.06043e-05	0.00174606
Os06t0611900-01	586.558	288.907	264.408	772.363	617.492	380.322	-1.06523	-10.7336	7.07824e-27	3.04315e-24
Os03t0226400-01	61.573	13.132	8.647	77.085	41.387	24.537	-1.62551	-3.84696	0.000119595	0.00598427
Os05t0582350-00	43.543	10.373	7.63	79.749	31.558	14.649	-1.57459	-3.28283	0.0010277	0.0377587
Os03t0766800-01	100.838	28.009	18.306	32.001	164.754	55.117	-2.52577	-10.204	1.90275e-24	7.48739e-22
Os04t0541700-01	52.517	15.01	32.845	73.463	57.752	33.094	-1.91336	-5.08881	3.60326e-07	2.99241e-05
Os03t0117100-02	85.191	31.682	44.081	93.283	69.807	65.942	-1.10912	-3.72816	0.00019288	0.00901356
Os01t0585300-01	150.637	62.873	93.94	237.609	136.46	149.943	-1.08738	-5.1298	2.90049e-07	2.4474e-05
Os04t0645100-02	132.419	35.052	46.428	185.12	81.234	44.946	-1.182	-4.23224	2.31377e-05	0.00135684
Os09t0346500-04	565.497	1318.78	960.263	1248.06	2931.3	1467.48	-1.12175	-24.4143	1.20612e-131	6.34795e-128
Os03t0292100-01	78.436	29.168	33.692	34.859	66.511	56.909	-1.15862	-3.76902	0.000163893	0.00791365
Os04t0234600-03	102.392	43.145	70.008	110.538	90.452	88.29	-1.03737	-4.01897	5.84535e-05	0.00314327
Os02t0759400-01	52.061	110.574	67.589	62.292	309.675	71.35	-1.45516	-9.70354	2.9121e-22	9.96861e-20
Os04t0459500-02	575.226	140.861	182.446	953.496	288.127	281.515	-1.00185	-6.97077	3.15206e-12	5.14409e-10
Os01t0912700-01	150.675	58.523	75.626	229.25	120.986	143.664	-1.01718	-4.57364	4.79326e-06	0.000326042
Os01t0952800-01	304.81	122.603	290.617	380.917	266.01	452.632	-1.0869	-7.1601	8.06206e-13	1.42627e-10
Os02t0209300-01	70.802	42.925	113.156	51.626	122.664	104.518	-1.48424	-6.19734	5.74253e-10	7.19611e-08
Os02t0488600-01	33.991	84.276	40.259	48.569	177.868	45.627	-1.04703	-5.67897	1.35507e-08	1.40531e-06
Os02t0575500-01	169.353	31.182	84.955	195.74	69.69	102.901	-1.12965	-3.78051	0.000156505	0.00761808
Os05t0105800-01	312.2	49.72	133.593	344.479	156.361	231.933	-1.6224	-7.46745	8.17639e-14	1.6239e-11
Os09t0538000-04	1.336	1.137	27.777	68.378	37.808	79.996	-5.0248	-6.30637	2.85649e-10	3.66684e-08
Os01t0639900-01	1132.07	511.767	592.055	1810.94	1289.68	1077.53	-1.30287	-18.2123	4.12012e-74	6.4251e-71
Os03t0152600-01	81.092	29.901	51.682	86.876	62.001	89.894	-1.02151	-3.2855	0.00101803	0.0374687
Os10t0195250-01	409.33	215.437	454.178	543.701	455.751	706.476	-1.05039	-9.1156	7.82395e-20	2.40458e-17
Os08t0502700-03	349.119	101.772	108.932	406.309	227.097	174.139	-1.12738	-6.81399	9.49285e-12	1.47489e-09
Os04t0491700-01	83.233	30.607	39.002	82.213	66.32	44.789	-1.085	-3.5697	0.000357391	0.0152834
Os03t0773800-03	364.125	61.034	97.639	622.887	277.556	217.812	-2.15451	-12.0488	1.96901e-33	1.15146e-30
Os01t0826900-01	74.948	17.501	23.439	79.493	52.879	33.501	-1.56467	-4.23002	2.33674e-05	0.00136841
Os04t0650700-01	50.505	10.635	12.063	94.712	79.561	34.353	-2.87266	-7.59407	3.10001e-14	6.46168e-12
Os04t0650700-04	41.871	3.994	6.784	107.045	82.592	17.384	-4.33951	-9.06475	1.24896e-19	3.81068e-17
Os01t0956200-01	16.131	66.82	33.111	16.503	184.121	33.625	-1.43172	-7.39123	1.45472e-13	2.83569e-11
Os02t0584800-01	101.724	26.484	60.189	49.055	77.655	126.014	-1.52137	-5.02181	5.11857e-07	4.13661e-05
Os08t0139700-01	175.498	13.585	30.794	423.176	105.101	70.393	-2.9211	-8.80133	1.35206e-18	3.8727e-16
Os06t0683400-02	151.786	44.969	39.757	50.791	147.31	88.54	-1.68127	-7.43483	1.047e-13	2.06966e-11
Os05t0128200-02	67.742	26.051	40.471	45.095	88.041	60.6	-1.72625	-5.85557	4.75382e-09	5.26736e-07
Os02t0216300-07	82.291	33.414	33.633	97.445	98.125	81.954	-1.52358	-5.65111	1.59416e-08	1.62524e-06
Os04t0444800-02	62.041	10.32	35.08	103.449	44.066	55.461	-2.06364	-4.67099	2.99757e-06	0.000209655
Os07t0258400-01	257.82	122.992	310.447	298.519	291.253	498.405	-1.21312	-8.18132	2.80744e-16	6.71632e-14
Os05t0148700-01	170.845	69.62	146.897	210.335	148.853	207.036	-1.06573	-5.27077	1.35851e-07	1.19916e-05
Os01t0332100-01	235.542	52.495	91.051	214.913	120.779	88.415	-1.17153	-5.12424	2.98745e-07	2.51573e-05
Os02t0698000-02	188.965	32.508	83.339	204.508	126.032	150.453	-1.92434	-7.54643	4.47335e-14	9.18783e-12
Os01t0974200-01	110.209	43.185	68.514	160.824	100.949	155.703	-1.19444	-4.75736	1.96141e-06	0.000141171
Os02t0101500-02	143.988	34.189	39.093	272.776	97.327	83.741	-1.47872	-5.505	3.69168e-08	3.54073e-06
Os02t0324700-01	36.79	94.699	62.807	40.448	210.785	72.755	-1.12377	-6.5477	5.8429e-11	8.14621e-09
Os10t0567400-01	248.549	65.258	167.507	275.43	151.574	238.61	-1.18521	-5.7938	6.88097e-09	7.3909e-07
Os05t0401100-01	63.998	23.792	26.249	118.855	68.717	39.601	-1.49961	-4.67397	2.95431e-06	0.000207147
Os11t0707000-01	346.358	97.074	215.294	440.05	364.362	521.105	-1.87763	-12.6227	1.58398e-36	1.0757e-33
Os03t0161900-01	42.784	12.264	22.522	57.477	36.595	52.72	-1.54663	-3.48923	0.000484413	0.0200159
Os02t0704000-01	5.674	34.363	1.938	10.972	124.264	9.968	-1.8239	-7.2269	4.94142e-13	9.08552e-11
Os03t0333400-01	156.059	47.985	83.427	165.725	99.704	101.922	-1.02448	-4.17641	2.96142e-05	0.00169187
Os02t0756800-01	13.74	66.314	17.633	21.194	180.736	45.457	-1.41591	-7.262	3.8142e-13	7.07475e-11
Os09t0537700-02	8.771	38.487	94.937	132.915	182.905	272.771	-2.21807	-9.95883	2.30764e-23	8.91406e-21
Os06t0608700-01	160.983	44.352	45.102	311.645	144.227	117.23	-1.67068	-7.32373	2.41177e-13	4.59491e-11
Os12t0291100-02	506.846	225.584	381.535	839.206	541.392	426.261	-1.23242	-11.2953	1.38464e-29	6.89274e-27
Os05t0291700-02	124.521	56.354	104.791	177.367	140.313	134.897	-1.28547	-5.94182	2.81881e-09	3.17342e-07
Os07t0170200-00	7.349	51.963	4.18	6.037	115.111	4.874	-1.11688	-4.81457	1.47517e-06	0.000108777
Os04t0683700-01	162.176	134.621	63.003	304.065	284.246	86.463	-1.04765	-7.18294	6.8227e-13	1.21211e-10
Os01t0623200-01	2.774	25.004	3.118	2.868	56.208	0.928	-1.13803	-3.41539	0.000636904	0.0252989
Os01t0191200-02	3.274	29.178	4.138	9.513	84.015	6.462	-1.49518	-5.15685	2.51133e-07	2.12755e-05
Os01t0191200-01	1.599	22.159	3.195	12.477	86.77	13.927	-1.93872	-6.29261	3.12166e-10	3.99506e-08
Os01t0655500-01	347.905	177.453	337.279	318.063	471.77	586.893	-1.38006	-11.5084	1.19678e-30	6.29878e-28
Os12t0292400-01	1019.61	193.985	157.718	1273.19	489.927	236.632	-1.30604	-11.2421	2.53152e-29	1.23942e-26
Os01t0823600-01	87.221	7.501	6.921	275.122	33.928	17.766	-2.14674	-4.20267	2.6378e-05	0.00152598
Os02t0731600-01	216.171	59.485	95.23	275.964	196.592	125.862	-1.69402	-8.63513	5.8662e-18	1.60387e-15
Os11t0644700-01	18.997	64.789	49.154	47.972	210.941	62.582	-1.67243	-8.86388	7.72804e-19	2.24406e-16
Os06t0318600-01	195.251	62.297	81.288	310.704	133.552	183.711	-1.06958	-5.0072	5.52289e-07	4.41255e-05
Os01t0186900-01	93.44	19.239	22.834	18.665	67.697	88.215	-1.78447	-5.25451	1.48423e-07	1.29924e-05
Os04t0493100-01	42.372	202.946	59.837	95.174	515.696	56.516	-1.31484	-11.5942	4.41051e-31	2.38082e-28
Os03t0738400-01	1067.04	413.236	596.471	1405.97	876.814	864.464	-1.05472	-12.6889	6.81267e-37	4.70242e-34
Os02t0748300-01	59.613	127.413	102.093	66.689	396.928	72.358	-1.60878	-11.8269	2.8342e-32	1.59112e-29
Os07t0673550-00	389.306	191.304	245.701	605.502	506.552	408.659	-1.37426	-11.8871	1.38147e-32	7.86038e-30
Os01t0908200-01	66.884	186.615	53.831	91.852	491.987	79.814	-1.36797	-11.674	1.73126e-31	9.46687e-29
Os04t0689500-01	21.611	56.935	16.208	51.846	132.303	28.812	-1.18587	-5.41533	6.11748e-08	5.64861e-06
Os07t0108300-01	529.201	229.854	321.94	719.855	470.412	486.962	-1.00262	-8.91344	4.94742e-19	1.45672e-16
Os11t0603200-01	354.715	94.742	150.582	386.24	198.912	255.597	-1.03947	-5.97005	2.3718e-09	2.72583e-07
Os11t0603200-02	108.677	31.385	75.001	137.41	72.892	86.826	-1.1851	-4.01738	5.88483e-05	0.00316047
Os02t0556800-01	106.154	48.868	31.783	198.837	105.453	57.99	-1.07905	-4.48135	7.41729e-06	0.000482697
Os06t0704700-01	110.051	10.596	39.233	136.583	31.563	52.365	-1.54413	-3.23662	0.00120953	0.043752
Os07t0412100-01	64.155	25.419	65.83	93.834	55.472	77.651	-1.09527	-3.28975	0.00100277	0.0370042
Os10t0492900-01	79.58	171.902	185.674	59.618	358.867	213.574	-1.03128	-7.96764	1.61737e-15	3.70106e-13
Os09t0115500-01	46.998	127.193	88.702	110.989	280.846	44.32	-1.11217	-7.49528	6.6159e-14	1.32317e-11
Os04t0602100-01	42.841	11.118	22.286	151.078	52.365	58.277	-2.20512	-5.3092	1.10105e-07	9.82196e-06
Os07t0142100-00	1620.1	670.728	2016.63	1807.88	1905.64	2533.72	-1.47589	-24.3432	6.83807e-131	3.19908e-127
Os01t0198900-01	104.49	42.387	58.4	132.215	99.833	104.038	-1.20531	-4.76506	1.88798e-06	0.000136587
Os09t0541000-01	16.457	51.857	12.436	53.433	110.054	20.888	-1.05502	-4.49478	6.96418e-06	0.000458884
Os01t0913000-01	308.825	102.309	117.783	427.456	263.275	179.035	-1.33305	-8.37148	5.69014e-17	1.42609e-14
Os06t0255400-01	121.697	47.007	51.522	72.18	138.512	70.31	-1.52848	-6.73007	1.69581e-11	2.53199e-09
Os04t0380300-01	142.067	63.965	110.514	113.682	133.861	120.106	-1.0348	-4.87928	1.06476e-06	8.10701e-05
Os01t0179600-01	63.324	5.609	35.366	128.644	25.727	71.191	-2.16688	-3.68112	0.000232208	0.010513
Os10t0536500-01	193.409	36.749	24.66	308.213	83.713	28.383	-1.15716	-4.22419	2.39801e-05	0.00139845
Os04t0650700-02	111.648	53.708	23.053	305.611	155.856	56.949	-1.50642	-7.06298	1.62972e-12	2.74478e-10
Os08t0468100-01	45.995	13.538	1.967	81.012	69.923	6.659	-2.33817	-6.35699	2.05746e-10	2.68203e-08
Os08t0468100-03	46.3	11.517	1.288	82.824	86.551	4.943	-2.8792	-7.92971	2.19659e-15	4.89353e-13
Os04t0657300-00	29.122	4.697	10.911	55.791	23.858	20.858	-2.31408	-3.69035	0.000223948	0.010227
Os06t0729000-01	53.472	14.167	35.472	91.438	38.672	42.122	-1.41817	-3.363	0.000771004	0.0295926
Os07t0142900-01	30.072	210.046	70.845	101.767	559.936	132.474	-1.38397	-12.5652	3.2795e-36	2.15755e-33
Os07t0601000-01	69.74	21.692	26.009	93.109	54.289	40.682	-1.29291	-3.7124	0.000205301	0.00954601
Os01t0279100-01	417.903	101.328	262.394	495.102	360.922	368.913	-1.80207	-12.2163	2.54414e-34	1.55248e-31
Os03t0838900-01	82.762	31.87	31.127	129.6	73.185	49.941	-1.16876	-3.98121	6.85642e-05	0.0036222
Os02t0562700-01	45.265	6.193	25.729	45.906	38.823	13.183	-2.61762	-5.05221	4.36738e-07	3.58457e-05
Os03t0731100-01	54.613	13.456	20.768	76.98	42.245	19.818	-1.61995	-3.87707	0.000105723	0.00535525
Os03t0273800-01	47.515	115.887	40.2	78.152	321.807	58.451	-1.44289	-9.82934	8.41692e-23	3.05513e-20
Os02t0703600-01	23.228	98.909	43.647	45.935	499.934	79.913	-2.30698	-16.8645	8.21254e-64	1.01703e-60
Os07t0422000-01	68.626	29.044	33.231	85.132	98.753	47.473	-1.735	-6.22358	4.85934e-10	6.10753e-08
Os07t0661400-01	136.697	327.749	134.485	210.33	852.541	140.784	-1.34859	-15.2031	3.37142e-52	3.15453e-49
Os01t0292200-01	82.778	37.057	40.893	126.452	112.524	41.448	-1.57183	-6.19123	5.96955e-10	7.43633e-08
Os08t0566600-01	185.091	44.151	51.406	295.152	133.061	104.885	-1.56098	-6.69874	2.10226e-11	3.06214e-09
Os01t0730500-01	26.255	74.28	19.059	29.899	183.143	36.529	-1.27134	-6.73033	1.69281e-11	2.53199e-09
Os05t0560000-01	699.007	1009.84	834.155	996.684	2344.23	1221.08	-1.1844	-22.7965	4.97074e-115	1.39529e-111
Os04t0282400-01	61.925	103.632	56.794	120.988	370.148	145.496	-1.80605	-12.3903	2.95091e-35	1.88255e-32
Os08t0560900-02	146.557	223.465	213.807	258.924	593.592	295.419	-1.37884	-12.901	4.44185e-38	3.11707e-35
Os04t0435500-01	13.614	41.04	19.479	23.322	85.859	22.383	-1.03435	-3.90624	9.37451e-05	0.00481946
Os08t0435900-01	867.177	982.924	822.441	1274.56	3228.67	1543.71	-1.6852	-34.9074	5.73406e-267	1.20716e-262
Os04t0667600-01	48.218	33.493	47.882	25.918	77.691	76.504	-1.1833	-4.14253	3.43496e-05	0.00193873
Os04t0628100-01	53.599	56.111	53.342	68.76	155.022	38.427	-1.43553	-6.79556	1.07895e-11	1.66407e-09
Os02t0162600-01	3.158	3.629	6.061	4.191	25.225	3.844	-2.76663	-4.1945	2.73471e-05	0.00157517
Os11t0130200-01	0.874	16.26	0.218	1.296	45.276	1.072	-1.44683	-3.694	0.000220753	0.0101092
Os01t0760000-01	18.126	30.191	20.23	23.255	65.442	16.454	-1.08551	-3.54736	0.000389114	0.0165492
Os05t0551000-01	52.108	39.555	49.761	34.412	98.062	80.032	-1.27925	-4.94849	7.47914e-07	5.85333e-05
Os06t0127100-01	7.326	4.557	6.636	4.056	35.907	13.966	-2.94752	-5.16712	2.3773e-07	2.02214e-05
Os02t0766700-01	41.663	34.583	30.852	45.153	78.578	23.705	-1.15348	-4.08215	4.46212e-05	0.00243923
Os03t0319400-01	17.793	6.726	3.887	37.564	35.33	5.378	-2.36249	-4.54645	5.4559e-06	0.000367582
Os04t0689500-02	12.193	15.408	2.594	17.861	54.687	14.956	-1.79693	-4.74538	2.08113e-06	0.000148771
Os05t0563900-01	33.666	56.993	49.893	50.671	145.249	49.945	-1.31909	-6.16748	6.93854e-10	8.56737e-08
Os02t0197600-01	324.727	521.66	493.159	442.974	1596.71	1094.74	-1.58334	-23.4604	1.03492e-121	3.63127e-118
Os04t0640500-01	38.191	36.309	17.177	61.625	75.22	22.262	-1.0202	-3.61504	0.000300304	0.0131574
Os02t0667300-01	9.607	19.072	11.829	8.06	61.113	20.303	-1.64944	-4.72391	2.31351e-06	0.000164823
Os09t0130300-01	24.449	34.63	36.741	20.312	78.657	58.135	-1.15297	-4.08276	4.45046e-05	0.00243676
Os02t0106100-01	4.064	6.006	1.588	13.235	40.718	5.012	-2.73061	-5.29273	1.20507e-07	1.07271e-05
Os02t0806300-01	3.124	5.44	4.554	2.228	30.034	5.062	-2.43433	-4.26589	1.99107e-05	0.00118914
Os03t0786100-01	607.779	327.815	220.151	790.872	765.001	375.369	-1.19199	-13.0791	4.33826e-39	3.09597e-36
Os09t0106700-01	19.527	18.682	14.808	23.96	85.418	16.127	-2.16231	-6.69878	2.10172e-11	3.06214e-09
Os02t0815400-01	35.685	63.783	45.413	43.76	153.183	68.607	-1.23343	-6.01099	1.84395e-09	2.15068e-07
Os03t0170100-00	7.299	6.246	3.646	3.609	30.014	8.732	-2.23405	-4.05182	5.08201e-05	0.00275036
Os02t0806400-01	22.092	44.171	37.121	32.609	174.907	41.174	-1.95483	-8.9835	2.62289e-19	7.8324e-17
Os03t0606100-01	3.006	15.581	3.226	4.807	44.654	4.955	-1.48842	-3.74688	0.000179051	0.00851858
Os08t0205800-01	59.015	76.602	67.557	54.809	284.06	100.647	-1.86016	-11.0747	1.66492e-28	7.87658e-26
Os03t0126800-00	66.005	49.021	51.262	100.079	118.483	53.888	-1.24262	-5.31735	1.05288e-07	9.45237e-06
Os04t0547900-01	18.923	43.445	20.992	20.691	124.999	19.85	-1.49407	-6.28678	3.24126e-10	4.12306e-08
Os02t0703700-00	2.945	13.959	6.952	5.278	44.374	10.799	-1.63793	-4.00518	6.19692e-05	0.00331539
Os08t0171700-01	7.295	19.179	7.091	9.163	48.577	10.779	-1.31016	-3.5479	0.000388321	0.0165321
Os03t0187700-01	28.389	41.025	34.099	30.754	91.033	39.174	-1.1193	-4.28895	1.79523e-05	0.00109302
Os04t0418500-01	18.159	23.854	23.198	15.856	56.896	23.461	-1.22351	-3.64001	0.000272626	0.0120958
Os06t0143400-01	41.103	61.439	42.005	62.166	148.429	43.25	-1.24196	-5.9491	2.69622e-09	3.05173e-07
Os03t0225900-01	26.703	23.877	17.119	31.677	52.261	15.389	-1.09953	-3.20317	0.00135926	0.0479729
Os03t0188500-01	15.542	34.387	18.729	14.781	98.218	36.921	-1.48354	-5.54353	2.9644e-08	2.88926e-06
Os06t0354700-01	48.937	78.595	48.643	46.862	172.834	55.599	-1.10629	-5.85444	4.78633e-09	5.27561e-07
Os03t0773000-01	8.435	27.937	17.93	11.277	109.683	30.632	-1.94251	-7.08406	1.39995e-12	2.36726e-10
Os07t0112700-01	5.393	7.252	0.869	4.214	53.145	2.926	-2.8429	-6.17405	6.65627e-10	8.24301e-08
Os01t0238500-01	80.426	74.902	84.775	127.938	252.082	113.241	-1.72023	-9.88465	4.85266e-23	1.8243e-20
Os03t0592500-02	19.319	13.806	17.206	34.056	70.826	24.141	-2.3284	-6.38197	1.74822e-10	2.30028e-08
Os06t0126500-01	69.289	39.602	20.993	108.868	96.103	25.115	-1.24842	-4.80637	1.53695e-06	0.000112938
Os02t0540700-00	15.387	9.564	12.918	7.923	89.825	13.748	-3.20085	-8.49387	1.99863e-17	5.16271e-15
Os07t0435300-01	637.762	818.871	625.182	888.355	1898.47	885.537	-1.18255	-20.485	2.92829e-93	6.16479e-90
Os08t0138900-01	116.913	93.074	69.696	135.813	228.633	106.429	-1.266	-7.49537	6.61105e-14	1.32317e-11
Os01t0575000-01	11.955	13.848	27.704	40.398	47.35	4.251	-1.7431	-4.32345	1.5361e-05	0.000942822
Os06t0320500-01	764.199	937.567	778.386	1047.18	2124.7	1086.35	-1.14968	-21.1917	1.13844e-99	2.66301e-96
Os10t0550900-01	12.989	28.323	18.043	16.572	60.456	18.943	-1.06333	-3.35272	0.000800228	0.030575
Os01t0689451-02	101.255	100.188	97.341	106.653	265.846	142.572	-1.3773	-8.62506	6.40565e-18	1.72891e-15
Os01t0689451-01	10.123	15.444	13.474	13.421	49.437	15.754	-1.64796	-4.24601	2.17613e-05	0.00128508
Os04t0604300-01	3.906	17.03	5.574	6.896	129.084	30.136	-2.89157	-9.70495	2.87206e-22	9.91213e-20
Os03t0241300-04	46.03	28.121	44.142	45.122	93.918	50.129	-1.70917	-6.00577	1.90429e-09	2.21492e-07
Os03t0388500-01	25.386	35.626	30.409	27.553	100.165	29.676	-1.46079	-5.53414	3.1276e-08	3.0273e-06
Os03t0241300-01	59.348	47.589	51.636	44.969	121.171	45.565	-1.31776	-5.62871	1.81564e-08	1.84211e-06
Os07t0680600-01	32.959	13.334	14.134	9.932	38.164	29.308	-1.48652	-3.46062	0.000538943	0.0219885
Os01t0121500-01	24.915	40.904	16.044	23.467	89.489	33.022	-1.09888	-4.18964	2.79395e-05	0.00160271
Os02t0216300-04	117.935	72.088	64.851	130.831	237.876	108.638	-1.69179	-9.48996	2.31125e-21	7.72344e-19
Os08t0478700-01	97.255	80.003	42.297	128.343	225.274	78.725	-1.46297	-8.30911	9.64266e-17	2.37429e-14
Os05t0202800-00	0.559	0.777	0	0.443	16.099	3.411	-4.34233	-4.00268	6.26279e-05	0.00334638
Os12t0236225-00	161.774	138.269	180.827	162.334	368.915	240.242	-1.38523	-10.2053	1.87707e-24	7.45602e-22
Os06t0594300-01	10.086	16.7	43.335	12.164	42.835	21.112	-1.32836	-3.36724	0.000759236	0.0293012
Os03t0274300-01	51.569	31.083	23.894	59.33	86.737	24.055	-1.44994	-5.12118	3.03636e-07	2.55181e-05
Os05t0160300-01	51.381	65.02	39.224	39.698	166.493	63.257	-1.32592	-6.62954	3.36731e-11	4.80612e-09
Os09t0457100-01	3.701	6.257	1.422	6.112	35.951	3.506	-2.4919	-4.73018	2.24318e-06	0.000160083
Os01t0949500-01	29.893	8.427	14.47	21.798	81.351	18.302	-3.24048	-8.12736	4.38729e-16	1.02626e-13
Os02t0677300-02	1.056	3.261	3.282	4.351	34.981	7.772	-3.3926	-5.43444	5.49703e-08	5.10933e-06
Os04t0201800-00	5.061	6.862	2.652	10.559	33.762	5.581	-2.26811	-4.33723	1.44292e-05	0.000894762
Os01t0739200-01	26.823	21.632	18.018	25.266	51.718	16.664	-1.22691	-3.47802	0.000505135	0.0207297
Os01t0886300-03	4.204	6.844	12.139	16.836	31.822	6.674	-2.18653	-4.1171	3.83667e-05	0.00212556
Os01t0716800-01	15.791	27.545	16.804	30.92	64.307	8.841	-1.1926	-3.79233	0.000149242	0.00731527
Os01t0782200-01	6.284	22.503	6.278	4.833	53.753	4.016	-1.22564	-3.54289	0.000395762	0.0167979
Os01t0243400-01	29.222	23.805	31.289	35.34	71.71	29.988	-1.56032	-4.91601	8.83274e-07	6.8114e-05
Os09t0533600-01	11.253	17.604	17.046	17.896	48.758	13.522	-1.43915	-3.81814	0.000134459	0.0066762
Os10t0180800-02	67.221	53.943	55.428	51.84	118.724	68.838	-1.10752	-4.85643	1.19521e-06	9.01869e-05
Os05t0566400-01	60.477	43.353	33.982	62.172	114.132	26.462	-1.36591	-5.61532	1.96195e-08	1.97627e-06
Os11t0695000-01	2.772	13.408	1.055	6.047	45.186	2.544	-1.7222	-4.18798	2.81443e-05	0.00161227
Os06t0270900-02	7.8	17.158	9.688	9.519	56.787	10.121	-1.69609	-4.64474	3.40508e-06	0.000235807
Os02t0126400-02	24.285	57.184	36.358	36.383	178.919	42.682	-1.61504	-7.96196	1.69341e-15	3.8334e-13
Os02t0126400-01	21.113	40.716	32.006	19.684	85.822	26.152	-1.04517	-3.93883	8.18791e-05	0.00428263
Os01t0583100-01	36.382	44.974	22.229	42.441	100.603	20.581	-1.13092	-4.54643	5.45633e-06	0.000367582
Os02t0806350-00	16.827	36.684	24.709	21.492	97.007	25.222	-1.37235	-5.1955	2.04175e-07	1.75088e-05
Os07t0545800-01	46.585	89.12	72.592	54.872	198.721	100.314	-1.12634	-6.36924	1.89965e-10	2.48401e-08
Os09t0369400-01	30.544	60.253	31.624	26.867	234.788	50.296	-1.93167	-10.3266	5.34377e-25	2.14285e-22
Os03t0171600-01	75.883	117.993	94.426	77.984	295.037	74.367	-1.29161	-8.64859	5.21392e-18	1.43485e-15
Os06t0320300-02	4.616	2.073	3.075	3.477	27.837	8.204	-3.71663	-5.02087	5.14367e-07	4.14893e-05
Os03t0262150-01	10.431	17.039	13.727	9.017	58.802	13.974	-1.75644	-4.84367	1.27461e-06	9.51552e-05
Os01t0600900-02	542.19	1029.04	665.718	1225.86	3475.89	1057.94	-1.7255	-36.8302	6.06178e-297	2.55231e-292
Os04t0412300-02	2.599	8.675	3.199	8.753	37.46	9.901	-2.07983	-4.32828	1.50278e-05	0.000925065
Os05t0143500-02	42.571	65.601	37.229	60.167	152.755	35.643	-1.18884	-5.8305	5.52628e-09	6.04374e-07
Os05t0143500-01	16.229	20.149	11.57	16.591	61.293	11.25	-1.57443	-4.57481	4.76659e-06	0.000324753
Os12t0510750-00	11.188	5.789	5.946	3.177	24.985	8.634	-2.07909	-3.53403	0.00040927	0.0172842
Os02t0194700-01	2.174	12.947	6.705	10.281	67.445	24.844	-2.35051	-6.26287	3.77955e-10	4.79331e-08
Os01t0949300-01	132.52	69.797	102.943	65.025	270.431	191.833	-1.92344	-11.0514	2.15829e-28	1.00972e-25
Os03t0169600-01	53.387	67.732	57.235	66.774	149.832	87.354	-1.11485	-5.48492	4.13648e-08	3.91385e-06
Os01t0557500-01	35.962	37.471	14.03	96.515	96.161	36.568	-1.32909	-5.04743	4.47799e-07	3.65399e-05
Os01t0862800-01	11.37	35.7	17.22	19.172	141.018	23.091	-1.9513	-8.05664	7.84179e-16	1.82419e-13
Os07t0563400-01	15.893	25.857	25.239	15.299	69.708	37.735	-1.40018	-4.47184	7.75495e-06	0.000503892
Os03t0729000-01	7.685	26.585	50.208	12.404	75.291	106.458	-1.47128	-4.82366	1.40947e-06	0.000104115
Os03t0302800-01	2.855	3.671	3.371	2.182	33.831	9.278	-3.17352	-5.19268	2.07288e-07	1.77036e-05
Os04t0497000-01	89.017	142.409	151.561	150.268	465.756	145.757	-1.67895	-13.2088	7.802e-40	5.66385e-37
Os10t0499400-01	28.352	25.015	23.781	29.557	72.787	41.952	-1.5103	-4.83575	1.32648e-06	9.85033e-05
Os07t0252400-02	16.826	15.758	12.063	36.59	44.954	12.283	-1.48178	-3.74699	0.000178972	0.00851858
Os02t0732200-01	8.047	32.646	8.837	15.376	70.273	9.769	-1.07548	-3.64833	0.00026395	0.0117356
Os02t0129300-01	1.195	15.754	0.86	1.134	45.466	0.503	-1.49848	-3.79973	0.000144854	0.00712187
Os03t0684700-01	15.263	19.082	5.645	25.624	74.186	16.388	-1.92835	-5.79771	6.72261e-09	7.25783e-07
Os02t0197600-02	186.38	203.645	328.514	360.669	435.492	195.874	-1.066	-9.01858	1.90538e-19	5.77164e-17
Os04t0304200-01	93.81	59.784	43.923	111.621	159.46	62.141	-1.38478	-6.70722	1.98368e-11	2.9102e-09
Os01t0314800-01	404.843	274.191	462.017	642.079	648.065	310.299	-1.21037	-12.184	3.78082e-34	2.27416e-31
Os07t0566150-00	14.062	3.918	6.655	6.22	48.018	17.766	-3.5848	-6.50742	7.64505e-11	1.04852e-08
Os05t0419500-01	12.39	12.205	8.096	14.161	46.059	13.869	-1.88543	-4.4999	6.79866e-06	0.00045009
Os02t0125300-01	44.8	88.812	65.231	37.111	194.703	75.098	-1.10186	-6.19373	5.87553e-10	7.34092e-08
Os03t0161200-01	45.867	43.456	29.407	119.679	142.031	31.383	-1.67799	-7.2903	3.09256e-13	5.7872e-11
Os02t0757100-01	2.02	11.343	5.425	4.058	61.662	31.595	-2.41199	-6.07986	1.20288e-09	1.45538e-07
Os12t0236100-00	390.704	435.484	690.479	319.926	1109.21	912.622	-1.31825	-17.0426	3.97034e-65	5.2241e-62
Os11t0182500-01	5.964	14.878	8.213	3.028	51.625	3.897	-1.7643	-4.55256	5.29965e-06	0.000358749
Os08t0434300-01	9.128	17.9	7.959	13.018	57.136	4.827	-1.64386	-4.55656	5.19986e-06	0.000352561
Os06t0650900-02	66.057	43.986	88.734	34.434	106.687	81.944	-1.24768	-5.0618	4.15322e-07	3.43559e-05
Os09t0522000-01	10.974	8.882	12.82	3.506	93.014	32.484	-3.35791	-8.82399	1.10453e-18	3.18535e-16
Os01t0720500-01	25.346	15.978	20.033	131.729	161.774	57.229	-3.30924	-11.5658	6.14473e-31	3.27499e-28
Os02t0739100-01	10.266	16.449	12.157	9.739	53.799	18.847	-1.67899	-4.48859	7.16974e-06	0.000470954
Os01t0864500-01	30.856	18.345	19.084	13.916	48.624	28.781	-1.3757	-3.68508	0.000228633	0.0104071
Os10t0521900-01	3.909	4.536	3.364	2.795	26.254	10.495	-2.50246	-4.05191	5.08003e-05	0.00275036
Os11t0645400-01	52.883	58.994	112.977	162.596	181.62	177.777	-1.5917	-7.93795	2.05547e-15	4.60348e-13
Os02t0815300-01	45.828	15.368	8.662	55.111	60.322	29.299	-1.94217	-5.25282	1.49787e-07	1.30846e-05
Os04t0639300-01	58.705	26.79	26.22	86.209	59.327	36.09	-1.11641	-3.45513	0.000550022	0.0223972
Os12t0516200-00	12.702	20.488	29.26	17.27	48.857	57.684	-1.2232	-3.37238	0.000745207	0.0288391
Os03t0319400-02	22.593	8.495	4.633	43.233	38.613	10.339	-2.15382	-4.49274	7.03134e-06	0.000462585

## Sheet: PEG_24h_up
List of up-regulated genes in transgenic rice plants OXR21 compared to wild type plants at 24h of PEG treatment
Gene_ID	OXR			WT			OXR 24h vs WT 24h
	0h	6h	24h	0h	6h	24h	normalized log2FC	z_score	P_value	FDR
Os10t0503300-00	31.521	11.231	57.063	50.613	14.338	25.775	1.19696	3.6335	0.0002796	0.0400428
Os06t0561000-01	314.493	104.668	120	233.91	16.388	28.264	2.13638	7.99179	1.32996e-15	1.35237e-12
Os07t0617000-01	38.287	101.987	51.723	22.339	25.536	21.926	1.28854	3.66534	0.000247008	0.036112
Os09t0417800-01	98.957	38.406	117.979	77.88	14.4	54.788	1.15698	5.08531	3.67027e-07	0.000119796
Os12t0576700-01	23.223	19.307	71.271	14.26	5.649	30.637	1.26842	4.25022	2.13557e-05	0.00461119
Os04t0688300-01	69.8	146.548	79.954	35.559	15.853	24.28	1.76978	5.75837	8.49281e-09	3.53615e-06
Os05t0429100-02	27.307	7.472	37.606	6.426	7.972	8.701	2.16209	4.50744	6.56147e-06	0.00163474
Os01t0124000-01	9.431	69.189	60.876	14.352	24.246	28.107	1.16533	3.67383	0.000238941	0.0353004
Os11t0454300-01	15.073	170.952	57.288	22.095	16.724	11.525	2.36385	5.87351	4.26675e-09	1.81466e-06
Os11t0677101-00	33.887	28.551	69.687	7.446	1.886	23.102	1.64325	5.10224	3.35651e-07	0.00011128
Os05t0208000-03	58.646	15.479	77.96	30.514	21.972	9.583	3.07457	7.87915	3.29612e-15	3.15417e-12
Os12t0242100-01	41.957	937.969	216.174	30.005	193.707	87.085	1.36208	7.82125	5.23031e-15	4.89382e-12
Os07t0539100-02	2.506	16.517	53.2	1.471	0.463	6.874	3.00259	6.43614	1.22551e-10	7.1667e-08
Os07t0539100-01	49.429	131.72	125.979	25.974	10.461	43.4	1.5878	6.69282	2.18909e-11	1.46304e-08
Os01t0615050-00	48.78	56.623	147.257	20.951	29.602	50.795	1.58596	7.22998	4.83053e-13	3.69799e-10
Os12t0559200-01	12.413	46.085	116.828	23.062	8.435	13.28	3.18744	9.80583	1.06268e-22	1.86435e-19
Os10t0419400-01	26.729	88.903	135.516	3.611	1.8	16.32	3.10413	10.4346	1.72315e-25	3.45493e-22
Os09t0448200-02	18.06	9.815	39.043	6.948	1.629	12.034	1.74833	3.9899	6.61014e-05	0.0118434
Os11t0618700-01	22.8	22.504	85.898	12.387	2.55	27.742	1.68093	5.75692	8.56639e-09	3.53615e-06
Os04t0688500-01	75.866	458.082	276.148	42.279	71.208	123.695	1.20904	8.05777	7.76971e-16	8.20962e-13
Os09t0115500-01	46.998	127.193	88.702	110.989	280.846	44.32	1.05139	4.08094	4.4853e-05	0.00850692
Os08t0167800-01	17.374	19.935	62.519	28.472	6.582	17.35	1.89974	5.34412	9.08575e-08	3.242e-05
Os12t0247700-01	17.741	131.335	187.916	12.206	8.865	12.718	3.93553	13.4883	1.83257e-41	6.43003e-38
Os06t0110000-01	33.184	10.312	43.651	5.711	1.987	9.863	2.1963	4.90391	9.39493e-07	0.000284585
Os05t0542500-02	12.566	79.965	42.286	11.282	7.978	8.267	2.40513	5.09769	3.43823e-07	0.000113099
Os02t0816300-01	166.87	68.351	177.836	101.525	42.473	87.487	1.07379	5.87885	4.13117e-09	1.77493e-06
Os04t0142400-01	147.692	96.257	205.501	94.64	49.909	90.011	1.24135	7.09675	1.27722e-12	9.43464e-10
Os01t0963000-01	37.108	60.963	171.129	19.126	2.649	68.136	1.37898	7.02441	2.14974e-12	1.5606e-09
Os01t0159000-01	6.671	98.626	75.798	1.401	19.434	34.449	1.18808	4.16307	3.13996e-05	0.00629563
Os01t0124100-01	77.193	47.948	150.561	64.426	9.727	50.871	1.61581	7.40983	1.26458e-13	1.02394e-10
Os10t0450900-02	341.736	857.849	886.796	179.1	159.108	289.814	1.66386	18.3699	2.28922e-75	1.60646e-71
Os11t0227200-01	43.217	22.573	72.695	16.626	5.935	33.22	1.18019	4.05542	5.0045e-05	0.00928257
Os12t0448900-01	60.94	54.337	111.342	53.31	63.585	55.15	1.06395	4.61678	3.89735e-06	0.00100674
Os07t0126301-01	120.427	91.023	93.79	29.281	5.351	24.596	1.98139	6.73108	1.68414e-11	1.16247e-08
Os10t0409400-01	393.252	747.403	1141.42	99.795	25.078	292.029	2.01703	23.7661	7.48692e-125	1.57618e-120
Os01t0575000-01	11.955	13.848	27.704	40.398	47.35	4.251	2.7546	4.44799	8.66759e-06	0.00209741
Os01t0124200-02	365.517	357.982	644.065	304.976	101.048	235.521	1.50173	14.5311	7.69324e-48	3.59915e-44
Os12t0277500-01	78.091	70.883	86.426	126.764	55.258	44.676	1.00235	3.87312	0.000107451	0.0183166
Os06t0547400-01	79.512	103.117	175.801	49.631	31.082	89.14	1.03018	5.65028	1.60188e-08	6.34299e-06
Os07t0125500-01	124.869	92.199	90.141	27.036	3.502	24.284	1.94256	6.51318	7.3575e-11	4.5541e-08
Os07t0129300-00	62.261	87.999	105.048	11.792	46.409	41.948	1.37476	5.49054	4.00705e-08	1.47997e-05
Os11t0113700-01	114.879	169.464	185.138	52.948	220.459	84.333	1.18481	6.49242	8.44695e-11	5.08084e-08
Os03t0291500-01	61.088	107.17	72.06	16.683	71.377	26.082	1.51653	4.89458	9.85134e-07	0.000294178
Os12t0555000-01	31.814	50.389	61.217	3.689	34.354	21.163	1.58277	4.65463	3.24565e-06	0.000864925
Os05t0491200-01	15.229	38.116	56.816	16.158	28.272	21.755	1.43533	4.17171	3.02318e-05	0.00613372
Os07t0539900-01	28.736	46.699	76.222	9.984	6.206	18.378	2.10261	6.30534	2.87558e-10	1.57242e-07
Os08t0190100-01	10.941	27.554	63.628	3.875	13.679	26.267	1.32679	4.15838	3.20515e-05	0.00636569
Os11t0684000-01	65.47	95.153	133.111	79.788	93.166	46.728	1.56065	6.79395	1.09102e-11	7.65627e-09
Os01t0615100-01	75.854	154.241	254.666	24.292	21.489	53.274	2.30748	12.2079	2.82083e-34	9.13623e-31
Os09t0279500-02	50.771	38.974	58.951	79.633	40.57	25.968	1.23316	3.78102	0.000156188	0.0245941

## Sheet: PEG_24h_down
List of down-regulated genes in transgenic rice plants OXR21 compared to wild type plants at 24h of PEG treatment
Gene_ID	OXR			WT			OXR 24h vs WT 24h
	0h	6h	24h	0h	6h	24h	normalized log2FC	z_score	P_value	FDR
Os03t0766800-01	100.838	28.009	18.306	32.001	164.754	55.117	-1.5398	-4.2539	2.10077e-05	0.00458305
Os10t0503800-01	63.443	82.343	30.598	114.332	144.211	79.456	-1.32634	-4.56529	4.98809e-06	0.00125763
Os09t0538000-04	1.336	1.137	27.777	68.378	37.808	79.996	-1.47566	-4.96629	6.82464e-07	0.000214441
Os01t0975900-01	11.766	44.198	31.11	45.957	88.281	68.411	-1.08647	-3.61728	0.000297718	0.041872
Os06t0696400-01	18.286	154.522	33.268	52.714	218.69	147.692	-2.1	-8.6185	6.78367e-18	7.93407e-15
Os03t0773800-03	364.125	61.034	97.639	622.887	277.556	217.812	-1.10717	-6.55438	5.58742e-11	3.67591e-08
Os02t0584800-01	101.724	26.484	60.189	49.055	77.655	126.014	-1.01563	-4.64613	3.38225e-06	0.00089006
Os08t0139700-01	175.498	13.585	30.794	423.176	105.101	70.393	-1.1424	-3.82099	0.000132917	0.0216196
Os06t0683400-02	151.786	44.969	39.757	50.791	147.31	88.54	-1.10474	-4.17119	3.03008e-05	0.00613372
Os02t0216300-07	82.291	33.414	33.633	97.445	98.125	81.954	-1.23456	-4.38485	1.16066e-05	0.00271497
Os01t0974200-01	110.209	43.185	68.514	160.824	100.949	155.703	-1.13394	-5.6492	1.61192e-08	6.34299e-06
Os02t0101500-02	143.988	34.189	39.093	272.776	97.327	83.741	-1.04864	-3.8882	0.000100991	0.017356
Os03t0725200-01	130.652	53.662	119.11	293.896	102.008	311.401	-1.3361	-9.08992	9.91134e-20	1.39106e-16
Os11t0707000-01	346.358	97.074	215.294	440.05	364.362	521.105	-1.22488	-10.9909	4.2255e-28	8.89574e-25
Os09t0537700-02	8.771	38.487	94.937	132.915	182.905	272.771	-1.47227	-9.15566	5.40279e-20	8.12444e-17
Os06t0608700-01	160.983	44.352	45.102	311.645	144.227	117.23	-1.3277	-5.54976	2.8606e-08	1.09496e-05
Os05t0208000-01	47.831	42.854	6.17	56.557	21.765	69.104	-3.43505	-7.6512	1.99109e-14	1.67669e-11
Os07t0147500-01	532.971	1118.49	849.731	210.772	1870.92	1991.93	-1.17871	-20.8595	1.2503e-96	1.3161e-92
Os06t0318600-01	195.251	62.297	81.288	310.704	133.552	183.711	-1.12594	-6.10153	1.05056e-09	5.26596e-07
Os01t0186900-01	93.44	19.239	22.834	18.665	67.697	88.215	-1.89946	-6.23762	4.44281e-10	2.39827e-07
Os06t0116800-02	31.286	6.811	12.584	46.514	16.017	55.058	-2.07898	-5.22832	1.71058e-07	5.90362e-05
Os04t0602100-01	42.841	11.118	22.286	151.078	52.365	58.277	-1.33641	-3.93257	8.40432e-05	0.0147443
Os04t0650700-02	111.648	53.708	23.053	305.611	155.856	56.949	-1.25433	-3.70102	0.000214732	0.0320612
Os12t0274750-00	309.853	41.351	44.156	452.28	41.057	157.55	-1.78475	-7.99004	1.34899e-15	1.35237e-12
Os04t0282400-01	61.925	103.632	56.794	120.988	370.148	145.496	-1.30679	-6.10753	1.01183e-09	5.1329e-07
Os02t0197600-01	324.727	521.66	493.159	442.974	1596.71	1094.74	-1.10008	-14.6243	1.96609e-48	1.03478e-44
Os04t0473150-00	28.196	19.607	21.929	71.618	33.778	695.999	-4.93779	-26.9043	1.95353e-159	8.22532e-155
Os04t0604300-01	3.906	17.03	5.574	6.896	129.084	30.136	-2.38432	-4.20751	2.58194e-05	0.0054086
Os03t0198500-01	3.691	10.647	2.939	7.698	2.955	25.647	-3.07501	-4.44122	8.94511e-06	0.00213997
Os03t0729000-01	7.685	26.585	50.208	12.404	75.291	106.458	-1.03391	-4.3335	1.46757e-05	0.00332214
Os02t0757100-01	2.02	11.343	5.425	4.058	61.662	31.595	-2.49162	-4.4191	9.91119e-06	0.00235769
Os04t0493600-01	57.221	74.901	86.469	83.336	49.109	199.904	-1.15867	-6.51277	7.3776e-11	4.5541e-08
Os01t0720500-01	25.346	15.978	20.033	131.729	161.774	57.229	-1.46399	-4.17573	2.97038e-05	0.00607126
