# Supplementary material for: Overexpression of <em>AmRosea1 </em>Gene Confers Drought and Salt Tolerance in Rice
Source: Preprints.org preprint supplement (doi:10.20944/preprints201612.0074.v1), 2016-12-14
Supplement: Supplementary file 3 [file supplementary]

Table S6. List of DEGs involved in plant hormone pathways under salt stress

| Hormone        | EC     | Gene_ID         | $\log_2(\text{RPKM}_{\text{OXR}}/\text{RPKM}_{\text{WT}})$ |           |           |
|----------------|--------|-----------------|------------------------------------------------------------|-----------|-----------|
|                |        |                 | 0h                                                         | 1h        | 6h        |
| Cytokinine     | A-ARR  | Os04t0673300-01 | 0.764954                                                   | -1.070037 | -0.241291 |
|                |        | Os11t0143300-01 | -2.214695                                                  | -1.208195 | 2.157301  |
|                |        | Os12t0139400-01 | -2.050575                                                  | -1.877847 | 0.362545  |
| Absciscic acid | SnRK2  | Os07t0622000-01 | -0.437177                                                  | -1.439286 | 0.192399  |
| Ethylene       | CTR1   | Os02t0527600-01 | 0.353983                                                   | 1.167067  | 0.133855  |
|                | EBF1/2 | Os06t0605900-01 | 1.068686                                                   | 0.48677   | 0.007147  |
| Jasmonic acid  | JAZ    | Os03t0402800-01 | -0.878805                                                  | -1.461285 | -0.143723 |
|                |        | Os07t0615200-01 | -0.687653                                                  | -1.525973 | -0.237743 |
| Salicylic acid | PR-1   | Os07t0129300-00 | -1.130328                                                  | -0.249022 | -1.460031 |
