# Supplementary material for: Overexpression of <em>AmRosea1 </em>Gene Confers Drought and Salt Tolerance in Rice
Source: Preprints.org preprint supplement (doi:10.20944/preprints201612.0074.v1), 2016-12-14
Supplement: Supplementary file 4 [file supplementary]

Table S5. List of DEGs involved in plant hormone pathways under drought stress

| Hormone        | EC      | Gene_ID         | $\log_2(\text{RPKM}_{\text{OXR}}/\text{RPKM}_{\text{WT}})$ |           |          |
|----------------|---------|-----------------|------------------------------------------------------------|-----------|----------|
|                |         |                 | 0h                                                         | 6h        | 24h      |
| Cytokinin      | A-ARR   | Os04t0673300-01 | 1.238085                                                   | 3.065659  | 0.979313 |
| Absciscic acid | PYR/PYL | Os03t0297600-01 | 0.563933                                                   | 1.987756  | -0.19252 |
|                |         | Os05t0473000-01 | 1.387322                                                   | 4.935228  | 0.705962 |
|                | PP2C    | Os01t0583100-01 | -0.170357                                                  | -1.130925 | 0.161511 |
|                | ABF     | Os02t0766700-01 | -0.064178                                                  | -1.153477 | 0.430554 |
| Ethylene       | EBF1/2  | Os06t0605900-01 | 1.120422                                                   | 2.458976  | 0.638164 |
| Jasmonic acid  | COI1    | Os05t0449500-01 | 0.676641                                                   | 1.037637  | 0.484258 |
| Salicylic acid | PR-1    | Os07t0129300-00 | 2.452397                                                   | 0.953668  | 1.374756 |
