# Supplementary material for: Overexpression of <em>AmRosea1 </em>Gene Confers Drought and Salt Tolerance in Rice
Source: Preprints.org preprint supplement (doi:10.20944/preprints201612.0074.v1), 2016-12-14
Supplement: Supplementary file 5 [file supplementary]

Table S10. Expressions of anthocyanin relating genes in OXR and WT plants under salt stress

| Gene ID         | OXR (RPKM) |         |        | WT (RPKM) |        |         |
|-----------------|------------|---------|--------|-----------|--------|---------|
|                 | 0h         | 1h      | 6h     | 0h        | 1h     | 6h      |
| <b>F3H</b>      |            |         |        |           |        |         |
| OS02T0767300-01 | 1.624      | 0.129   | 0      | 0.962     | 0.362  | 0       |
| Os03t0122300-01 | 122.342    | 172.764 | 91.472 | 174.902   | 354.6  | 113.196 |
| Os04t0581000-01 | 3.723      | 3.016   | 0.648  | 3.99      | 6.655  | 0.427   |
| <b>F3'H</b>     |            |         |        |           |        |         |
| Os10t0317900-01 | 19.664     | 7.843   | 2.046  | 37.843    | 7.572  | 0.649   |
| Os10t0320100-01 | 1.971      | 0.847   | 1.421  | 5.476     | 0.791  | 1.988   |
| <b>FLS</b>      |            |         |        |           |        |         |
| OS02T0767300-01 | 1.624      | 0.129   | 0      | 0.962     | 0.362  | 0       |
| <b>DFR</b>      |            |         |        |           |        |         |
| OS01T0633500-00 | 0          | 0       | 0      | 0         | 0      | 0       |
| Os03t0184550-01 | 48.98      | 82.765  | 48.436 | 27.077    | 18.01  | 44.685  |
| OS03T0184600-01 | 15.193     | 15.91   | 11.596 | 13.312    | 12.659 | 14.467  |
| OS08T0183900-01 | 8.599      | 10.503  | 18.592 | 14.881    | 10.973 | 22.537  |
| Os08t0515900-01 | 0.863      | 0.865   | 1.037  | 0.517     | 0.577  | 0.626   |
| Os09t0491868-00 | 0          | 0       | 0      | 0         | 0      | 0       |
| <b>UFGT</b>     |            |         |        |           |        |         |
| Os06t0192100-00 | 0.247      | 0.266   | 0      | 0.185     | 0.186  | 0       |
| Os07t0148200-01 | 3.251      | 2.362   | 5.685  | 3.981     | 6.014  | 6.883   |
