# Supplementary material for: Overexpression of <em>AmRosea1 </em>Gene Confers Drought and Salt Tolerance in Rice
Source: Preprints.org preprint supplement (doi:10.20944/preprints201612.0074.v1), 2016-12-14
Supplement: Supplementary file 6 [file supplementary]

Table S11. Primers for qRT-PCR.

| Gene ID         | Primer F (5'-3')          | Primer R (5'-3')          | Gene name                                                  |
|-----------------|---------------------------|---------------------------|------------------------------------------------------------|
| Os10t0409400-01 | CGGTGCGTCACATCAGCAG       | TTTATTCCCTTGACCTTACCAATCA | RD22                                                       |
| Os06T0716700-01 | CACAATGACGACAAACAGCATG    | CAGGGGTTTCATTCCATGTATCC   | Heat shock protein (HSP90)                                 |
| Os05T0542500-02 | CGTCCTCCAACAGGCGAGT       | CTCGTCTTCGGTCATCCCCA      | LEA-like protein                                           |
| Os11T0454300-01 | GCTCCAGCTCAAGCTCGTCTG     | CTGCTGCTCGCCCTTGTTG       | Water-stress inducible protein RAB16A                      |
| Os06t0727200-02 | GTCGGAGAGCGAGGCCCTA       | AGGGATACGCTCCCTGTCAAAC    | Catalase (CAT)                                             |
| Os10t0419400-01 | AGCCAGAGGTTACTCTTATGTGGAC | CGGTATGCAGGTGTTCTTCAAAGA  | Submergence-induced protein 2 (Sip2)                       |
| Os04t0549700-01 | GCAGACGCGAGCCATACACC      | GAGCTCTTGGGCCGGTCTTG      | Dehydration responsive element binding protein 1F (DREB1F) |
| Os01t0975300-01 | GATCAACGCTGGTTGTTGGATC    | AGCTCTTCCCGCTGCGCT        | MYB48                                                      |
| Os12t0156100-01 | CGCGAGGATTGTCAGTGATCC     | GGAAGGATGGTAGCCGTAGACGT   | NAC134                                                     |
| Os12t0113500-01 | GGAATCTGGAGTCAAACCAGAGTG  | GTCTGATCTGCTCCGAAAGCC     | CIPK14                                                     |
