# Supplementary material for: Overexpression of <em>AmRosea1 </em>Gene Confers Drought and Salt Tolerance in Rice
Source: Preprints.org preprint supplement (doi:10.20944/preprints201612.0074.v1), 2016-12-14
Supplement: Supplementary file 7 [file supplementary]

Table S7. List of DEGs related stress tolerance in OXR plants compared with WT under drought condition.

| Gene ID                           | log <sub>2</sub> (RPKM <sub>OXR</sub> /RPKM <sub>WT</sub> ) |       |       | Description                                           |
|-----------------------------------|-------------------------------------------------------------|-------|-------|-------------------------------------------------------|
|                                   | 0h                                                          | 6h    | 24h   |                                                       |
| HSP (heat shock protein)          |                                                             |       |       |                                                       |
| Os01t0135900-02                   | -0.26                                                       | 1.15  | 0.36  | LMW heat shock protein.                               |
| Os01t0184100-01                   | 1.08                                                        | 2.14  | -0.46 | Similar to 17.5 kDa class II heat shock protein.      |
| Os06t0650900-02                   | 0.99                                                        | -1.25 | 0.17  | Heat shock protein DnaJ family protein.               |
| Os06t0716700-01                   | -2.92                                                       | 2.69  | 0.68  | Similar to Heat shock protein 90.                     |
| Os07t0517100-03                   | 0.20                                                        | 1.49  | -0.27 | Similar to 18.8 kDa class V heat shock protein.       |
| Os11t0216100-01                   | -0.09                                                       | -1.00 | -0.89 | Similar to Heat shock protein binding protein.        |
| LEA (late embryogenesis abundant) |                                                             |       |       |                                                       |
| Os01t0314800-01                   | -0.61                                                       | -1.21 | 0.62  | Late embryogenesis abundant protein 3 family protein. |
| Os05t0542500-02                   | 0.21                                                        | 3.36  | 2.41  | LEA-like protein.                                     |
| Chaperone protein                 |                                                             |       |       |                                                       |
| Os08t0452900-01                   | 0.09                                                        | 1.26  | 0.12  | Similar to Chaperone protein dnaJ.                    |
| Os12t0277500-01                   | -0.65                                                       | 0.39  | 1.00  | 60 kDa chaperonin alpha subunit                       |
| Metallothionein                   |                                                             |       |       |                                                       |
| Os01t0974200-01                   | -0.49                                                       | -1.19 | -1.13 | RicMT (Metallothionein-like protein).                 |
| Os05t0202800-00                   | 0.39                                                        | -4.34 | NA    | Similar to Metallothionein-like protein 3B.           |
