# Supplementary material for: Overexpression of <em>AmRosea1 </em>Gene Confers Drought and Salt Tolerance in Rice
Source: Preprints.org preprint supplement (doi:10.20944/preprints201612.0074.v1), 2016-12-14
Supplement: Supplementary file 8 [file supplementary]

Table S1. Summary of mapping results

| Map to gene          | WT-PEG-0h    |            | WT-PEG-6h    |            | WT-PEG-24h   |            | WT-salt-0h   |            | WT-salt-1h   |            | WT-salt-6h   |            |
|----------------------|--------------|------------|--------------|------------|--------------|------------|--------------|------------|--------------|------------|--------------|------------|
|                      | Reads number | percentage |
| clean reads          | 7333513      | 100%       | 7116841      | 100%       | 7389213      | 100%       | 7387204      | 100%       | 7239102      | 100%       | 7390469      | 100%       |
| Total mapped reads   | 6596369      | 89.95%     | 6432701      | 90.39%     | 6265857      | 84.80%     | 6669882      | 90.29%     | 6607019      | 91.27%     | 6768117      | 91.58%     |
| Total unmapped reads | 737144       | 10.05%     | 684140       | 9.61%      | 1123356      | 15.20%     | 717322       | 9.71%      | 632083       | 8.73%      | 622352       | 8.42%      |
| Unique_match         | 3293165      | 44.91%     | 3283291      | 46.13%     | 3168963      | 42.89%     | 3314077      | 44.86%     | 3409482      | 47.10%     | 3656368      | 49.47%     |
| Multi-position match | 3303204      | 45.04%     | 3149410      | 44.25%     | 3096894      | 41.91%     | 3355805      | 45.43%     | 3197537      | 44.17%     | 3111749      | 42.10%     |
| Perfect match        | 6040500      | 82.37%     | 5874905      | 82.55%     | 5711530      | 77.30%     | 6129419      | 82.97%     | 6048954      | 83.56%     | 6180542      | 83.63%     |
| <=5bp mismatch       | 525415       | 7.16%      | 530256       | 7.45%      | 522317       | 7.07%      | 505249       | 6.84%      | 526733       | 7.28%      | 548742       | 7.42%      |
| Map to gene          | OXR-PEG-0h   |            | OXR-PEG-6h   |            | OXR-PEG-24h  |            | OXR-salt-0h  |            | OXR-salt-1h  |            | OXR-salt-6h  |            |
|                      | Reads number | percentage |
| clean reads          | 7245902      | 100%       | 7321939      | 100%       | 7401080      | 100%       | 7221670      | 100%       | 7336233      | 100%       | 7344809      | 100%       |
| Total mapped reads   | 6449341      | 89.01%     | 6556674      | 89.55%     | 6598040      | 89.15%     | 6501240      | 90.02%     | 6173666      | 84.15%     | 6639746      | 90.40%     |
| Total unmapped reads | 796561       | 10.99%     | 765265       | 10.45%     | 803040       | 10.85%     | 720430       | 9.98%      | 1162567      | 15.85%     | 705063       | 9.60%      |
| Unique_match         | 3239357      | 44.71%     | 3309357      | 45.20%     | 3343701      | 45.18%     | 3246232      | 44.95%     | 3208032      | 43.73%     | 3554091      | 48.39%     |
| Multi-position match | 3209984      | 44.30%     | 3247317      | 44.35%     | 3254339      | 43.97%     | 3255008      | 45.07%     | 2965634      | 40.42%     | 3085655      | 42.01%     |
| Perfect match        | 5885693      | 81.23%     | 6009162      | 82.07%     | 6075612      | 82.09%     | 5954529      | 82.45%     | 5635346      | 76.82%     | 6034068      | 82.15%     |
| <=5bp mismatch       | 529401       | 7.31%      | 512213       | 7.00%      | 484554       | 6.55%      | 514871       | 7.13%      | 502769       | 6.85%      | 559694       | 7.62%      |
